# Supplementary material for: Targeted next generation sequencing can serve as an alternative to conventional tests in myeloid neoplasms
Source: PubMed Central journal article supplement (PMC6402635; doi:10.1371/journal.pone.0212228), 2019-03-06
Supplement: pone.0212228.s001.pdf [file pone.0212228.s001.pdf]

**S1 Table. Genes included in the myeloid NGS panel**

| <b>Official name</b> | <b>Entrez.ID</b> | <b>Disorder (OMIM)</b>                                                                                                                                                                                                                                                                                                                                                                                                                                                                                                            |
|----------------------|------------------|-----------------------------------------------------------------------------------------------------------------------------------------------------------------------------------------------------------------------------------------------------------------------------------------------------------------------------------------------------------------------------------------------------------------------------------------------------------------------------------------------------------------------------------|
| ABCB7                | 22               | Anemia, sideroblastic, with ataxia, 301310 (3), X-linked recessive; Cerebellar ataxia                                                                                                                                                                                                                                                                                                                                                                                                                                             |
| ABL1                 | 25               | Leukemia, Philadelphia chromosome-positive, resistant to imatinib (3)                                                                                                                                                                                                                                                                                                                                                                                                                                                             |
| ACD                  | 65057            | ?Dyskeratosis congenita, autosomal dominant 6, 616553 (3), Autosomal recessive, Autosomal dominant; ?Dyskeratosis congenita, autosomal recessive 7, 616553 (3), Autosomal recessive, Autosomal dominant; Hoyeraal-Hreidarsson syndrome                                                                                                                                                                                                                                                                                            |
| ADA                  | 100              | Adenosine deaminase deficiency, partial, 102700 (3), Autosomal recessive, Somatic mosaicism; Severe combined immunodeficiency due to ADA deficiency, 102700 (3), Autosomal recessive, Somatic mosaicism; Adenosine deaminase deficiency                                                                                                                                                                                                                                                                                           |
| AK2                  | 204              | Reticular dysgenesis, 267500 (3), Autosomal recessive; Reticular dysgenesis                                                                                                                                                                                                                                                                                                                                                                                                                                                       |
| ANKRD26              | 22852            | Thrombocytopenia 2, 188000 (3), Autosomal dominant; Thrombocytopaenia 2                                                                                                                                                                                                                                                                                                                                                                                                                                                           |
| AP3B1                | 8546             | Hermansky-Pudlak syndrome 2, 608233 (3), Autosomal recessive; Hermansky-Pudlak syndrome                                                                                                                                                                                                                                                                                                                                                                                                                                           |
| ASXL1                | 171023           | Bohring-Opitz syndrome, 605039 (3), Autosomal dominant; Myelodysplastic syndrome, somatic, 614286 (3); Bohrning-Opitz syndrome                                                                                                                                                                                                                                                                                                                                                                                                    |
| ATM                  | 472              | Ataxia-telangiectasia, 208900 (3), Autosomal recessive; {Breast cancer, susceptibility to}, 114480 (3), Autosomal dominant; Lymphoma, B-cell non-Hodgkin, somatic (3); Lymphoma, mantle cell, somatic (3); T-cell polymphocytic leukemia, somatic (3); Ataxia telangiectasia                                                                                                                                                                                                                                                      |
| ATR                  | 545              | ?Cutaneous telangiectasia and cancer syndrome, familial, 614564 (3), Autosomal dominant; Seckel syndrome 1, 210600 (3), Autosomal recessive; Seckel syndrome                                                                                                                                                                                                                                                                                                                                                                      |
| ATRX                 | 546              | Mental retardation, X-linked 52, 300504 (2); ATRX syndrome                                                                                                                                                                                                                                                                                                                                                                                                                                                                        |
| BCOR                 | 54880            | Microphthalmia, syndromic 2, 300166 (3), X-linked dominant; Oculofaciocardiodental syndrome                                                                                                                                                                                                                                                                                                                                                                                                                                       |
| BCORL1               | 63035            | ; Intellectual disability, coarse face & hypotonia                                                                                                                                                                                                                                                                                                                                                                                                                                                                                |
| BLM                  | 641              | Bloom syndrome, 210900 (3), Autosomal recessive; Bloom syndrome                                                                                                                                                                                                                                                                                                                                                                                                                                                                   |
| BRAF                 | 673              | Adenocarcinoma of lung, somatic, 211980 (3); Cardiofaciocutaneous syndrome, 115150 (3), Autosomal dominant; Colorectal cancer, somatic (3); LEOPARD syndrome 3, 613707 (3), Autosomal dominant; Melanoma, malignant, somatic (3); Non-small cell lung cancer, somatic (3); Noonan syndrome 7, 613706 (3); Cardio-facio-cutaneous syndrome                                                                                                                                                                                         |
| BRCA1                | 672              | {Breast-ovarian cancer, familial, 1}, 604370 (3), Autosomal dominant, Multifactorial; {Pancreatic cancer, susceptibility to, 4}, 614320 (3); Breast cancer                                                                                                                                                                                                                                                                                                                                                                        |
| BRCA2                | 675              | {Breast cancer, male, susceptibility to}, 114480 (3), Autosomal dominant; {Breast-ovarian cancer, familial, 2}, 612555 (3), Autosomal dominant; Fanconi anemia, complementation group D1, 605724 (3), Autosomal recessive; {Glioblastoma 3}, 613029 (3), Autosomal recessive; {Medulloblastoma}, 155255 (3), Autosomal dominant; {Pancreatic cancer 2}, 613347 (3); {Prostate cancer}, 176807 (3), Autosomal dominant; Wilms tumor, 194070 (3), Autosomal dominant, Somatic mutation; Breast cancer, sporadic, protection against |
| BRCC3                | 79184            |                                                                                                                                                                                                                                                                                                                                                                                                                                                                                                                                   |
| BRINP3               | 339479           |                                                                                                                                                                                                                                                                                                                                                                                                                                                                                                                                   |
| BRIP1                | 83990            | Breast cancer, early-onset, 114480 (3), Autosomal dominant; Fanconi anemia, complementation group J, 609054 (3); ; Breast cancer                                                                                                                                                                                                                                                                                                                                                                                                  |

|          |        |                                                                                                                                                                                                                                                                                                   |
|----------|--------|---------------------------------------------------------------------------------------------------------------------------------------------------------------------------------------------------------------------------------------------------------------------------------------------------|
| C15ORF41 | 84529  | Dyserythropoietic anemia, congenital, type Ib, 615631 (3), Autosomal recessive; Congenital dyserythropoietic anaemia type 1                                                                                                                                                                       |
| C17orf97 | 400566 |                                                                                                                                                                                                                                                                                                   |
| CALR     | 811    | Myelofibrosis, somatic, 254450 (3); Thrombocythemia, somatic, 187950 (3); Psychosis, association with                                                                                                                                                                                             |
| CBL      | 867    | ?Juvenile myelomonocytic leukemia, 607785 (3), Autosomal dominant, Somatic mutation; Noonan syndrome-like disorder with or without juvenile myelomonocytic leukemia, 613563 (3), Autosomal dominant; Noonan-like syndrome                                                                         |
| CBLB     | 868    | ; Diabetes, type 1                                                                                                                                                                                                                                                                                |
| CBLC     | 23624  | ; Reduced LDL cholesterol levels                                                                                                                                                                                                                                                                  |
| CDAN1    | 146059 | Dyserythropoietic anemia, congenital, type Ia, 224120 (3), Autosomal recessive; ; Congenital dyserythropoietic anaemia type 1                                                                                                                                                                     |
| CDKN2A   | 1029   | Melanoma and neural system tumor syndrome, 155755 (3), Autosomal dominant; {Melanoma, cutaneous malignant, 2}, 155601 (3), Autosomal dominant; Orolaryngeal cancer, multiple (3); Pancreatic cancer/melanoma syndrome, 606719 (3), Autosomal dominant; Melanoma, increased risk, association with |
| CEBPA    | 1050   | ?Leukemia, acute myeloid, 601626 (3), Autosomal dominant; Leukemia, acute myeloid, somatic, 601626 (3); Acute myeloid leukaemia                                                                                                                                                                   |
| CREBBP   | 1387   | Rubinstein-Taybi syndrome, 180849 (3), Autosomal dominant; Blue cone monochromacy, 303700 (3), X-linked recessive; Colorblindness, protan, 303900 (3), X-linked; Rubinstein-Taybi syndrome                                                                                                        |
| CSF2RA   | 1438   | Surfactant metabolism dysfunction, pulmonary, 4, 300770 (3); Pulmonary alveolar proteinosis                                                                                                                                                                                                       |
| CSF3R    | 1441   | Neutropenia, severe congenital, 7, autosomal recessive, 617014 (3); Neutropaenia                                                                                                                                                                                                                  |
| CTC1     | 80169  | Cerebroretinal microangiopathy with calcifications and cysts, 612199 (3), Autosomal recessive; Cerebroretinal microangiopathy with calcifications & cysts                                                                                                                                         |
| CTCF     | 10664  | Mental retardation, autosomal dominant 21, 615502 (3), Autosomal dominant; Intellectual disability                                                                                                                                                                                                |
| CUX1     | 1523   |                                                                                                                                                                                                                                                                                                   |
| CXCR4    | 7852   | Myelokathexis, isolated (3); WHIM syndrome, 193670 (3), Autosomal dominant; WHIM syndrome                                                                                                                                                                                                         |
| DAXX     | 1616   |                                                                                                                                                                                                                                                                                                   |
| DCLRE1C  | 64421  | Omenn syndrome, 603554 (3), Autosomal recessive; Severe combined immunodeficiency, Athabascan type, 602450 (3), Autosomal recessive; Immunodeficiency, severe combined                                                                                                                            |
| DDX41    | 51428  | {Myeloproliferative/lymphoproliferative neoplasms, familial (multiple types), susceptibility to}, 616871 (3), Autosomal dominant; Refractory anaemia with excess blasts, type 1                                                                                                                   |
| DKC1     | 1736   | Dyskeratosis congenita, X-linked, 305000 (3), X-linked recessive; Dyskeratosis congenita                                                                                                                                                                                                          |
| DNMT1    | 1786   | Cerebellar ataxia, deafness, and narcolepsy, autosomal dominant, 604121 (3), Autosomal dominant; Neuropathy, hereditary sensory, type IE, 614116 (3), Autosomal dominant; Neurological disorder                                                                                                   |
| DNMT3A   | 1788   | Tatton-Brown-Rahman syndrome, 615879 (3), Autosomal dominant; Overgrowth syndrome with intellectual disability                                                                                                                                                                                    |
| EED      | 8726   | ; Ulcerative colitis, susceptibility to                                                                                                                                                                                                                                                           |

|        |        |                                                                                                                                                                                                                                                                                                                                                                                                                      |
|--------|--------|----------------------------------------------------------------------------------------------------------------------------------------------------------------------------------------------------------------------------------------------------------------------------------------------------------------------------------------------------------------------------------------------------------------------|
| EGFR   | 1956   | Adenocarcinoma of lung, response to tyrosine kinase inhibitor in, 211980 (3), Autosomal recessive; ?Inflammatory skin and bowel disease, neonatal, 2, 616069 (3), Autosomal recessive; Non-small cell lung cancer, response to tyrosine kinase inhibitor in, 211980 (3), Autosomal recessive; {Non-small cell lung cancer, susceptibility to}, 211980 (3), Autosomal recessive; Glioblastoma, risk, association with |
| EGLN1  | 54583  | Erythrocytosis, familial, 3, 609820 (3), Autosomal dominant; [Hemoglobin, high altitude adaptation], 609070 (3), Autosomal dominant; Erythrocytosis and paraganglioma                                                                                                                                                                                                                                                |
| ELANE  | 1991   | Neutropenia, cyclic, 162800 (3), Autosomal dominant; Neutropenia, severe congenital 1, autosomal dominant, 202700 (3), Autosomal dominant; Neutropaenia, congenital                                                                                                                                                                                                                                                  |
| EPAS1  | 2034   | Erythrocytosis, familial, 4, 611783 (3); Polycythaemia with paraganglioma                                                                                                                                                                                                                                                                                                                                            |
| EPOR   | 2057   | [Erythrocytosis, familial, 1], 133100 (3), Autosomal dominant; Erythrocytosis                                                                                                                                                                                                                                                                                                                                        |
| ERCC4  | 2072   | Fanconi anemia, complementation group Q, 615272 (3), Autosomal recessive; ?XFE progeroid syndrome, 610965 (3); Xeroderma pigmentosum, group F, 278760 (3), Autosomal recessive; Xeroderma pigmentosum, type F/Cockayne syndrome, 278760 (3), Autosomal recessive; Xeroderma pigmentosum (F)                                                                                                                          |
| ETNK1  | 55500  |                                                                                                                                                                                                                                                                                                                                                                                                                      |
| ETV6   | 2120   | Leukemia, acute myeloid, somatic, 601626 (3); Thrombocytopenia 5, 616216 (3), Autosomal dominant; Thrombocytopenia & haematologic malignancy                                                                                                                                                                                                                                                                         |
| EZH2   | 2146   | Weaver syndrome, 277590 (3), Autosomal dominant; ; Weaver syndrome                                                                                                                                                                                                                                                                                                                                                   |
| FAM47A | 158724 |                                                                                                                                                                                                                                                                                                                                                                                                                      |
| FANCA  | 2175   | Fanconi anemia, complementation group A, 227650 (3), Autosomal recessive; Fanconi anaemia                                                                                                                                                                                                                                                                                                                            |
| FANCB  | 2187   | Fanconi anemia, complementation group B, 300514 (3); Fanconi anaemia                                                                                                                                                                                                                                                                                                                                                 |
| FANCC  | 2176   | Fanconi anemia, complementation group C, 227645 (3), Autosomal recessive; Fanconi anaemia                                                                                                                                                                                                                                                                                                                            |
| FANCD2 | 2177   | Fanconi anemia, complementation group D2, 227646 (3), Autosomal recessive; Fanconi anaemia                                                                                                                                                                                                                                                                                                                           |
| FANCE  | 2178   | Fanconi anemia, complementation group E, 600901 (3), Autosomal recessive; Esophageal cancer                                                                                                                                                                                                                                                                                                                          |
| FANCF  | 2188   | Fanconi anemia, complementation group F, 603467 (3); Fanconi anaemia                                                                                                                                                                                                                                                                                                                                                 |
| FANCG  | 2189   | Fanconi anemia, complementation group G, 614082 (3); Fanconi anaemia                                                                                                                                                                                                                                                                                                                                                 |
| FANCI  | 55215  | Fanconi anemia, complementation group I, 609053 (3); Fanconi anaemia                                                                                                                                                                                                                                                                                                                                                 |
| FANCL  | 55120  | Fanconi anemia, complementation group L, 614083 (3), Autosomal recessive; Fanconi anaemia                                                                                                                                                                                                                                                                                                                            |
| FANCM  | 57697  | ; Breast cancer, non-BRCA1/BRCA2 related                                                                                                                                                                                                                                                                                                                                                                             |
| FAT1   | 2195   | ; Facioscapulohumeral dystrophy-like phenotype                                                                                                                                                                                                                                                                                                                                                                       |
| FBXW7  | 55294  |                                                                                                                                                                                                                                                                                                                                                                                                                      |
| FLRT2  | 23768  |                                                                                                                                                                                                                                                                                                                                                                                                                      |
| FLT3   | 2322   | Leukemia, acute lymphoblastic, somatic, 613065 (3); Leukemia, acute myeloid, reduced survival in, somatic, 601626 (3); Leukemia, acute myeloid, somatic, 601626 (3); Myeloid leukaemia, increased risk, association with                                                                                                                                                                                             |
| G6PC3  | 92579  | Dursun syndrome, 612541 (3), Autosomal recessive; Neutropenia, severe congenital 4, autosomal recessive, 612541 (3), Autosomal recessive; Neutropaenia, congenital                                                                                                                                                                                                                                                   |

|        |       |                                                                                                                                                                                                                                                                                                                                                                                                                                                                                                                                     |
|--------|-------|-------------------------------------------------------------------------------------------------------------------------------------------------------------------------------------------------------------------------------------------------------------------------------------------------------------------------------------------------------------------------------------------------------------------------------------------------------------------------------------------------------------------------------------|
| GATA1  | 2623  | Anemia, X-linked, with/without neutropenia and/or platelet abnormalities, 300835 (3), X-linked recessive; Leukemia, megakaryoblastic, with or without Down syndrome, somatic, 190685 (3); Thrombocytopenia with beta-thalassemia, X-linked, 314050 (3), X-linked recessive; Thrombocytopenia, X-linked, with or without dyserythropoietic anemia, 300367 (3), X-linked recessive; Dyserythropoietic anaemia and megakaryocyte dysplasia                                                                                             |
| GATA2  | 2624  | Emberger syndrome, 614038 (3), Autosomal dominant; Immunodeficiency 21, 614172 (3), Autosomal dominant; {Leukemia, acute myeloid, susceptibility to}, 601626 (3), Autosomal dominant; {Myelodysplastic syndrome, susceptibility to}, 614286 (3); Monocytopenia & mycobacterial infection syndrome                                                                                                                                                                                                                                   |
| GFI1   | 2672  | Neutropenia, nonimmune chronic idiopathic, of adults, 607847 (3); Neutropenia, severe congenital 2, autosomal dominant, 613107 (3); Neutropaenia, congenital                                                                                                                                                                                                                                                                                                                                                                        |
| GJB3   | 2707  | Deafness, autosomal dominant 2B, 612644 (3), Autosomal dominant; Deafness, autosomal dominant, with peripheral neuropathy (3); Deafness, autosomal recessive (3); Deafness, digenic, GJB2/GJB3, 220290 (3), Autosomal recessive, Digenic dominant; Erythrokeratoderma variabilis et progressiva, 133200 (3), Autosomal recessive, Autosomal dominant; Erythrokeratoderma variabilis                                                                                                                                                 |
| GNAS   | 2778  | ACTH-independent macronodular adrenal hyperplasia, 219080 (3), Isolated cases; Acromegaly, somatic, 102200 (3); McCune-Albright syndrome, somatic, mosaic, 174800 (3); Osseous heteroplasia, progressive, 166350 (3), Autosomal dominant; Pseudohypoparathyroidism Ia, 103580 (3), Autosomal dominant; Pseudohypoparathyroidism Ib, 603233 (3), Autosomal dominant; Pseudohypoparathyroidism Ic, 612462 (3), Autosomal dominant; Pseudopseudohypoparathyroidism, 612463 (3), Autosomal dominant; Albright hereditary osteodystrophy |
| GNB1   | 2782  | Leukemia, acute lymphoblastic, somatic, 613065 (3); Mental retardation, autosomal dominant 42, 616973 (3), Autosomal dominant; Neurodevelopmental delay, infantile spasms and focal seizures                                                                                                                                                                                                                                                                                                                                        |
| GPRC5A | 9052  | ; BRCA1-related breast cancer risk, modifier of                                                                                                                                                                                                                                                                                                                                                                                                                                                                                     |
| HAX1   | 10456 | Neutropenia, severe congenital 3, autosomal recessive, 610738 (3), Autosomal recessive; Kostmann disease                                                                                                                                                                                                                                                                                                                                                                                                                            |
| HBB    | 3043  | Delta-beta thalassemia, 141749 (3), Autosomal dominant; Erythremias, beta- (3); Heinz body anemias, beta-, 140700 (3), Autosomal dominant; Hereditary persistence of fetal hemoglobin, 141749 (3), Autosomal dominant; {Malaria, resistance to}, 611162 (3); Methemoglobinemias, beta- (3); Sickle cell anemia, 603903 (3), Autosomal recessive; Thalassemia-beta, dominant inclusion-body, 603902 (3); Thalassemias, beta-, 613985 (3); Thalassemia beta                                                                           |
| HNRNPK | 3190  | Au-Kline syndrome, 616580 (3), Autosomal dominant; Intellectual disability, facial dysmorphisms and skeletal and connective tissue abnormalities                                                                                                                                                                                                                                                                                                                                                                                    |
| HRAS   | 3265  | {Bladder cancer, somatic}, 109800 (3); Congenital myopathy with excess of muscle spindles, 218040 (3), Autosomal dominant, Isolated cases; Costello syndrome, 218040 (3), Autosomal dominant, Isolated cases; {Nevus sebaceous or woolly hair nevus, somatic}, 162900 (3); Schimmelpenning-Feuerstein-Mims syndrome, somatic mosaic, 163200 (3); {Spitz nevus or nevus spilus, somatic}, 137550 (3); {Thyroid carcinoma, follicular, somatic}, 188470 (3); Costello syndrome                                                        |
| IDH1   | 3417  | {Glioma, susceptibility to, somatic}, 137800 (3); Osteoarthritis, early-onset                                                                                                                                                                                                                                                                                                                                                                                                                                                       |
| IDH2   | 3418  | D-2-hydroxyglutaric aciduria 2, 613657 (3); D-2-hydroxyglutaric aciduria, type II                                                                                                                                                                                                                                                                                                                                                                                                                                                   |

|        |       |                                                                                                                                                                                                                                                                                                                                                                                                                                                                                                                                  |
|--------|-------|----------------------------------------------------------------------------------------------------------------------------------------------------------------------------------------------------------------------------------------------------------------------------------------------------------------------------------------------------------------------------------------------------------------------------------------------------------------------------------------------------------------------------------|
| IFNG   | 3458  | {AIDS, rapid progression to}, 609423 (3); {Aplastic anemia}, 609135 (3); {Hepatitis C virus, response to therapy of}, 609532 (3); {TSC2 angiomyolipomas, renal, modifier of}, 613254 (3), Autosomal dominant; {Tuberculosis, protection against}, 607948 (3); Hashimoto disease, severity, association with                                                                                                                                                                                                                      |
| IKZF1  | 10320 | Immunodeficiency, common variable, 13, 616873 (3), Autosomal dominant                                                                                                                                                                                                                                                                                                                                                                                                                                                            |
| IL2RG  | 3561  | Combined immunodeficiency, X-linked, moderate, 312863 (3), X-linked recessive; Severe combined immunodeficiency, X-linked, 300400 (3), X-linked recessive; Immunodeficiency, severe combined                                                                                                                                                                                                                                                                                                                                     |
| IRF1   | 3659  | Gastric cancer, somatic, 613659 (3); Myelodysplastic syndrome, preleukemic (3); Myelogenous leukemia, acute (3); Non-small cell lung cancer, somatic, 211980 (3); Reduced expression                                                                                                                                                                                                                                                                                                                                             |
| JAGN1  | 84522 | Neutropenia, severe congenital, 6, autosomal recessive, 616022 (3), Autosomal recessive; Neutropaenia                                                                                                                                                                                                                                                                                                                                                                                                                            |
| JAK1   | 3716  |                                                                                                                                                                                                                                                                                                                                                                                                                                                                                                                                  |
| JAK2   | 3717  | {Budd-Chiari syndrome, somatic}, 600800 (3); Erythrocytosis, somatic, 133100 (3); Leukemia, acute myeloid, somatic, 601626 (3); Myelofibrosis, somatic, 254450 (3); Polycythemia vera, somatic, 263300 (3); Thrombocythemia 3, 614521 (3), Autosomal dominant, Somatic mutation; Thrombocytosis                                                                                                                                                                                                                                  |
| JAK3   | 3718  | SCID, autosomal recessive, T-negative/B-positive type, 600802 (3), Autosomal recessive; Immunodeficiency, severe combined                                                                                                                                                                                                                                                                                                                                                                                                        |
| KAT6A  | 7994  | Mental retardation, autosomal dominant 32, 616268 (3), Autosomal dominant; Hypotonia, intellectual disability, feeding/oromotor difficulties, microcephaly/craniosynostosis, cardiac & facial defects                                                                                                                                                                                                                                                                                                                            |
| KCNA4  | 3739  |                                                                                                                                                                                                                                                                                                                                                                                                                                                                                                                                  |
| KCNK13 | 56659 |                                                                                                                                                                                                                                                                                                                                                                                                                                                                                                                                  |
| KDM6A  | 7403  | Kabuki syndrome 2, 300867 (3), X-linked dominant; Renal cancer                                                                                                                                                                                                                                                                                                                                                                                                                                                                   |
| KDR    | 3791  | Hemangioma, capillary infantile, somatic, 602089 (3); {Hemangioma, capillary infantile, susceptibility to}, 602089 (3), Autosomal dominant; Coronary heart disease, association with                                                                                                                                                                                                                                                                                                                                             |
| KIF23  | 9493  | ; Intellectual disability and microcephaly                                                                                                                                                                                                                                                                                                                                                                                                                                                                                       |
| KIT    | 3815  | Gastrointestinal stromal tumor, familial, 606764 (3), Autosomal dominant, Isolated cases; Germ cell tumors, 273300 (3), Somatic mutation; Leukemia, acute myeloid, 601626 (3), Autosomal dominant; Mast cell disease, 154800 (3), Autosomal dominant; Piebaldism, 172800 (3), Autosomal dominant; Mastocytosis                                                                                                                                                                                                                   |
| KLF1   | 10661 | Blood group--Lutheran inhibitor, 111150 (3); Dyserythropoietic anemia, congenital, type IV, 613673 (3), Autosomal dominant; [Hereditary persistence of fetal hemoglobin], 613566 (3); Hereditary persistence of foetal haemoglobin                                                                                                                                                                                                                                                                                               |
| KMT2A  | 4297  | Leukemia, myeloid/lymphoid or mixed-lineage, 159555 (2), Autosomal dominant; Wiedemann-Steiner syndrome, 605130 (3), Autosomal dominant; Epileptic encephalopathy with infantile spasms                                                                                                                                                                                                                                                                                                                                          |
| KMT2C  | 58508 | ; Autism                                                                                                                                                                                                                                                                                                                                                                                                                                                                                                                         |
| KRAS   | 3845  | Bladder cancer, somatic, 109800 (3); Breast cancer, somatic, 114480 (3); Cardiofaciocutaneous syndrome 2, 615278 (3); Gastric cancer, somatic, 137215 (3); Leukemia, acute myeloid, 601626 (3), Autosomal dominant; Lung cancer, somatic, 211980 (3); Noonan syndrome 3, 609942 (3); Pancreatic carcinoma, somatic, 260350 (3); RAS-associated autoimmune leukoproliferative disorder, 614470 (3), Autosomal dominant; Schimmelpenning-Feuerstein-Mims syndrome, somatic mosaic, 163200 (3); Lung cancer, risk, association with |
| LAMB4  | 22798 | ; Colorectal cancer                                                                                                                                                                                                                                                                                                                                                                                                                                                                                                              |

|         |        |                                                                                                                                                                                                                                                                                                                                                                                                                                                                                 |
|---------|--------|---------------------------------------------------------------------------------------------------------------------------------------------------------------------------------------------------------------------------------------------------------------------------------------------------------------------------------------------------------------------------------------------------------------------------------------------------------------------------------|
| LAMTOR2 | 28956  | Immunodeficiency due to defect in MAPBP-interacting protein, 610798 (3), Autosomal recessive; Primary immunodeficiency disease                                                                                                                                                                                                                                                                                                                                                  |
| LIG4    | 3981   | LIG4 syndrome, 606593 (3); {Multiple myeloma, resistance to}, 254500 (3), Somatic mutation; LIG4 syndrome                                                                                                                                                                                                                                                                                                                                                                       |
| LRRC4   | 64101  | ; Autism spectrum disorder                                                                                                                                                                                                                                                                                                                                                                                                                                                      |
| LUC7L2  | 51631  |                                                                                                                                                                                                                                                                                                                                                                                                                                                                                 |
| LYST    | 1130   | Chediak-Higashi syndrome, 214500 (3), Autosomal recessive; Chediak-Higashi syndrome                                                                                                                                                                                                                                                                                                                                                                                             |
| MAP2K1  | 5604   | Cardiofaciocutaneous syndrome 3, 615279 (3); Cardio-facio-cutaneous syndrome                                                                                                                                                                                                                                                                                                                                                                                                    |
| MCD1    | #N/A   |                                                                                                                                                                                                                                                                                                                                                                                                                                                                                 |
| MPL     | 4352   | Myelofibrosis with myeloid metaplasia, somatic, 254450 (3); Thrombocythemia 2, 601977 (3), Autosomal dominant, Somatic mutation; Thrombocytopenia, congenital amegakaryocytic, 604498 (3), Autosomal recessive; Amegakaryocytic thrombocytopaenia, congenital                                                                                                                                                                                                                   |
| MRE11A  | 4361   | Ataxia-telangiectasia-like disorder, 604391 (3), Autosomal recessive; Ataxia telangiectasia-like disease                                                                                                                                                                                                                                                                                                                                                                        |
| MYC     | 4609   | Burkitt lymphoma, 113970 (3), Isolated cases; Myoclonus, familial cortical, 614937 (3), Autosomal dominant; Colorectal and prostate cancer, association with                                                                                                                                                                                                                                                                                                                    |
| MYD88   | 4615   | Macroglobulinemia, Waldenstrom, somatic, 153600 (3); Pyogenic bacterial infections, recurrent, due to MYD88 deficiency, 612260 (3); Reduced function                                                                                                                                                                                                                                                                                                                            |
| NBN     | 4683   | Aplastic anemia, 609135 (3); Leukemia, acute lymphoblastic, 613065 (3); Nijmegen breakage syndrome, 251260 (3), Autosomal recessive; Nijmegen breakage syndrome                                                                                                                                                                                                                                                                                                                 |
| NCOR2   | 9612   | ; Schizophrenia                                                                                                                                                                                                                                                                                                                                                                                                                                                                 |
| NF1     | 4763   | Leukemia, juvenile myelomonocytic, 607785 (3), Autosomal dominant, Somatic mutation; Neurofibromatosis, familial spinal, 162210 (3), Autosomal dominant; Neurofibromatosis, type 1, 162200 (3), Autosomal dominant; Neurofibromatosis-Noonan syndrome, 601321 (3), Autosomal dominant; Watson syndrome, 193520 (3), Autosomal dominant; Neurofibromatosis                                                                                                                       |
| NHP2    | 55651  | Dyskeratosis congenita, autosomal recessive 2, 613987 (3), Autosomal recessive; Dyskeratosis congenita                                                                                                                                                                                                                                                                                                                                                                          |
| NOP10   | 55505  | Dyskeratosis congenita, autosomal recessive 1, 224230 (3), Autosomal recessive; Dyskeratosis congenita, autosomal recessive                                                                                                                                                                                                                                                                                                                                                     |
| NOTCH1  | 4851   | Adams-Oliver syndrome 5, 616028 (3), Autosomal dominant; Aortic valve disease 1, 109730 (3), Autosomal dominant; Aortic valve disease                                                                                                                                                                                                                                                                                                                                           |
| NPM1    | 4869   | Leukemia, acute myeloid, somatic, 601626 (3)                                                                                                                                                                                                                                                                                                                                                                                                                                    |
| NRAS    | 4893   | Colorectal cancer, somatic, 114500 (3); Epidermal nevus, somatic, 162900 (3); Melanocytic nevus syndrome, congenital, somatic, 137550 (3); Neurocutaneous melanosis, somatic, 249400 (3); Noonan syndrome 6, 613224 (3), Autosomal dominant; ?RAS-associated autoimmune lymphoproliferative syndrome type IV, somatic, 614470 (3); Schimmelpenning-Feuerstein-Mims syndrome, somatic mosaicism, 163200 (3); Thyroid carcinoma, follicular, somatic, 188470 (3); Noonan syndrome |
| NSD1    | 64324  | Beckwith-Wiedemann syndrome, 130650 (3), Autosomal dominant; Leukemia, acute myeloid, 601626 (1), Autosomal dominant; Sotos syndrome 1, 117550 (3), Autosomal dominant; Sotos syndrome                                                                                                                                                                                                                                                                                          |
| NTRK3   | 4916   | ; Congenital heart defects                                                                                                                                                                                                                                                                                                                                                                                                                                                      |
| OR13H1  | 347468 |                                                                                                                                                                                                                                                                                                                                                                                                                                                                                 |
| OR8B12  | 219858 |                                                                                                                                                                                                                                                                                                                                                                                                                                                                                 |
| P2RY2   | 5029   |                                                                                                                                                                                                                                                                                                                                                                                                                                                                                 |

|         |       |                                                                                                                                                                                                                                                                                                                                                                                                                                                                                                                                                                                                                                                                            |
|---------|-------|----------------------------------------------------------------------------------------------------------------------------------------------------------------------------------------------------------------------------------------------------------------------------------------------------------------------------------------------------------------------------------------------------------------------------------------------------------------------------------------------------------------------------------------------------------------------------------------------------------------------------------------------------------------------------|
| PALB2   | 79728 | {Breast cancer, susceptibility to}, 114480 (3), Autosomal dominant; Fanconi anemia, complementation group N, 610832 (3); {Pancreatic cancer, susceptibility to, 3}, 613348 (3); Breast cancer                                                                                                                                                                                                                                                                                                                                                                                                                                                                              |
| PARN    | 5073  | Dyskeratosis congenita, autosomal recessive 6, 616353 (3), Autosomal recessive; Pulmonary fibrosis and/or bone marrow failure, telomere-related, 4, 616371 (3), Autosomal dominant; Dyskeratosis congenita                                                                                                                                                                                                                                                                                                                                                                                                                                                                 |
| PAX5    | 5079  | {Leukemia, acute lymphoblastic, susceptibility to, 3}, 615545 (3); Acute lymphoblastic leukaemia                                                                                                                                                                                                                                                                                                                                                                                                                                                                                                                                                                           |
| PCDHB1  | 29930 |                                                                                                                                                                                                                                                                                                                                                                                                                                                                                                                                                                                                                                                                            |
| PDGFRA  | 5156  | Gastrointestinal stromal tumor, somatic, 606764 (3); Hypereosinophilic syndrome, idiopathic, resistant to imatinib, 607685 (3), Isolated cases, Somatic mutation; Cleft palate, isolated                                                                                                                                                                                                                                                                                                                                                                                                                                                                                   |
| PHF6    | 84295 | Borjeson-Forssman-Lehmann syndrome, 301900 (3), X-linked recessive; Borjeson-Forssman-Lehmann syndrome                                                                                                                                                                                                                                                                                                                                                                                                                                                                                                                                                                     |
| PIGA    | 5277  | Multiple congenital anomalies-hypotonia-seizures syndrome 2, 300868 (3), X-linked recessive; Paroxysmal nocturnal hemoglobinuria, somatic, 300818 (3); Cleft palate, neonatal seizures, contractures and central nervous system malformations                                                                                                                                                                                                                                                                                                                                                                                                                              |
| PML     | 5371  | Leukemia, acute promyelocytic, PML/RARA type (3); Colon cancer                                                                                                                                                                                                                                                                                                                                                                                                                                                                                                                                                                                                             |
| POT1    | 25913 | {Glioma susceptibility 9}, 616568 (3), Autosomal dominant; {Melanoma, cutaneous malignant, susceptibility to, 10}, 615848 (3), Autosomal dominant; Cardiac angiosarcoma                                                                                                                                                                                                                                                                                                                                                                                                                                                                                                    |
| PRAMEF2 | 65122 |                                                                                                                                                                                                                                                                                                                                                                                                                                                                                                                                                                                                                                                                            |
| PRF1    | 5551  | Aplastic anemia, 609135 (3); Hemophagocytic lymphohistiocytosis, familial, 2, 603553 (3), Autosomal recessive; Lymphoma, non-Hodgkin, 605027 (3); Haemophagocytic lymphohistiocytosis, familial                                                                                                                                                                                                                                                                                                                                                                                                                                                                            |
| PRPF40B | 25766 |                                                                                                                                                                                                                                                                                                                                                                                                                                                                                                                                                                                                                                                                            |
| PTEN    | 5728  | Bannayan-Riley-Ruvalcaba syndrome, 153480 (3), Autosomal dominant; Cowden syndrome 1, 158350 (3), Autosomal dominant; Endometrial carcinoma, somatic, 608089 (3); {Glioma susceptibility 2}, 613028 (3); Lhermitte-Duclos syndrome, 158350 (3), Autosomal dominant; Macrocephaly/autism syndrome, 605309 (3), Autosomal dominant; Malignant melanoma, somatic, 155600 (3); {Meningioma}, 607174 (3), Autosomal dominant; PTEN hamartoma tumor syndrome (3); {Prostate cancer, somatic}, 176807 (3); Squamous cell carcinoma, head and neck, somatic, 275355 (3); VATER association with macrocephaly and ventriculomegaly, 276950 (3), Autosomal recessive; Cowden disease |
| PTPN11  | 5781  | LEOPARD syndrome 1, 151100 (3), Autosomal dominant; Leukemia, juvenile myelomonocytic, somatic, 607785 (3); Metachondromatosis, 156250 (3), Autosomal dominant; Noonan syndrome 1, 163950 (3), Autosomal dominant; Noonan syndrome                                                                                                                                                                                                                                                                                                                                                                                                                                         |
| RAB27A  | 5873  | Griscelli syndrome, type 2, 607624 (3), Autosomal recessive; Griscelli syndrome type 2                                                                                                                                                                                                                                                                                                                                                                                                                                                                                                                                                                                     |
| RAC1    | 5879  |                                                                                                                                                                                                                                                                                                                                                                                                                                                                                                                                                                                                                                                                            |
| RAC2    | 5880  | Neutrophil immunodeficiency syndrome, 608203 (3); Neutrophil immunodeficiency syndrome                                                                                                                                                                                                                                                                                                                                                                                                                                                                                                                                                                                     |
| RAD21   | 5885  | Cornelia de Lange syndrome 4, 614701 (3), Autosomal dominant; Chronic intestinal pseudo-obstruction                                                                                                                                                                                                                                                                                                                                                                                                                                                                                                                                                                        |
| RAD50   | 10111 | Nijmegen breakage syndrome-like disorder, 613078 (3); Breast and/or ovarian cancer                                                                                                                                                                                                                                                                                                                                                                                                                                                                                                                                                                                         |
| RAD51   | 5888  | {Breast cancer, susceptibility to}, 114480 (3), Autosomal dominant; Mirror movements 2, 614508 (3), Autosomal dominant; Breast cancer, increased risk in BRCA2 carriers, association with                                                                                                                                                                                                                                                                                                                                                                                                                                                                                  |

|        |        |                                                                                                                                                                                                                                                                                                                                   |
|--------|--------|-----------------------------------------------------------------------------------------------------------------------------------------------------------------------------------------------------------------------------------------------------------------------------------------------------------------------------------|
| RAD51C | 5889   | {Breast-ovarian cancer, familial, susceptibility to, 3}, 613399 (3); Fanconi anemia, complementation group O, 613390 (3), Autosomal recessive; Breast and/or ovarian cancer                                                                                                                                                       |
| RAF1   | 5894   | Cardiomyopathy, dilated, INN, 615916 (3), Autosomal dominant; LEOPARD syndrome 2, 611554 (3); Noonan syndrome 5, 611553 (3); Cardiomyopathy, dilated                                                                                                                                                                              |
| RB1    | 5925   | Bladder cancer, somatic, 109800 (3); Osteosarcoma, somatic, 259500 (3); Retinoblastoma, 180200 (3), Autosomal dominant, Somatic mutation; Retinoblastoma, trilateral, 180200 (3), Autosomal dominant, Somatic mutation; Small cell cancer of the lung, somatic, 182280 (3); Retinoblastoma                                        |
| RBM8A  | 9939   | Thrombocytopenia-absent radius syndrome, 274000 (3), Autosomal recessive; Reduced promoter activity                                                                                                                                                                                                                               |
| RIT1   | 6016   | Noonan syndrome 8, 615355 (3), Autosomal dominant; Noonan syndrome                                                                                                                                                                                                                                                                |
| RMRP   | 6023   | Anauxetic dysplasia, 607095 (3), Autosomal recessive; Cartilage-hair hypoplasia, 250250 (3), Autosomal recessive; Metaphyseal dysplasia without hypotrichosis, 250460 (3), Autosomal recessive; Cartilage-Hair hypoplasia                                                                                                         |
| RNF168 | 165918 | RIDDLE syndrome, 611943 (3), Autosomal recessive; RNF168 deficiency                                                                                                                                                                                                                                                               |
| RPL10  | 6134   | {Autism, susceptibility to, X-linked 5}, 300847 (3); Microcephaly                                                                                                                                                                                                                                                                 |
| RPL11  | 6135   | Diamond-Blackfan anemia 7, 612562 (3); Diamond-Blackfan anaemia                                                                                                                                                                                                                                                                   |
| RPL15  | 6138   | ?Diamond-Blackfan anemia 12, 615550 (3), Autosomal dominant                                                                                                                                                                                                                                                                       |
| RPL26  | 6154   | ?Diamond-Blackfan anemia 11, 614900 (3), Autosomal dominant; Diamond-Blackfan anaemia                                                                                                                                                                                                                                             |
| RPL35A | 6165   | Diamond-Blackfan anemia 5, 612528 (3); Diamond-Blackfan anaemia                                                                                                                                                                                                                                                                   |
| RPL5   | 6125   | Diamond-Blackfan anemia 6, 612561 (3); Diamond-Blackfan anaemia                                                                                                                                                                                                                                                                   |
| RPS10  | 6204   | Diamond-Blackfan anemia 9, 613308 (3); Diamond-Blackfan anaemia                                                                                                                                                                                                                                                                   |
| RPS14  | 6208   | Macrocytic anemia, refractory, due to 5q deletion, somatic, 153550 (3)                                                                                                                                                                                                                                                            |
| RPS15  | 6209   | ; Diamond-Blackfan anaemia                                                                                                                                                                                                                                                                                                        |
| RPS17  | 6218   | Diamond-Blackfan anemia 4, 612527 (3)                                                                                                                                                                                                                                                                                             |
| RPS19  | 6223   | Diamond-Blackfan anemia 1, 105650 (3), Autosomal dominant; Diamond-Blackfan anaemia                                                                                                                                                                                                                                               |
| RPS24  | 6229   | Diamond-blackfan anemia 3, 610629 (3); Diamond-Blackfan anaemia                                                                                                                                                                                                                                                                   |
| RPS26  | 6231   | Diamond-Blackfan anemia 10, 613309 (3), Autosomal dominant; Diamond-Blackfan anaemia                                                                                                                                                                                                                                              |
| RPS7   | 6201   | Diamond-Blackfan anemia 8, 612563 (3); Diamond-Blackfan anaemia                                                                                                                                                                                                                                                                   |
| RTEL1  | 51750  | Dyskeratosis congenita, autosomal dominant 4, 615190 (3), Autosomal recessive, Autosomal dominant; Dyskeratosis congenita, autosomal recessive 5, 615190 (3), Autosomal recessive, Autosomal dominant; Pulmonary fibrosis and/or bone marrow failure, telomere-related, 3, 616373 (3), Autosomal dominant; Dyskeratosis congenita |
| RUNX1  | 861    | Leukemia, acute myeloid, 601626 (3), Autosomal dominant; Platelet disorder, familial, with associated myeloid malignancy, 601399 (3), Autosomal dominant; Platelet disorder, familial                                                                                                                                             |
| SAXO2  | 283726 |                                                                                                                                                                                                                                                                                                                                   |
| SBDS   | 51119  | {Aplastic anemia, susceptibility to}, 609135 (3); Shwachman-Diamond syndrome, 260400 (3), Autosomal recessive; Shwachman-Diamond syndrome                                                                                                                                                                                         |
| SBF2   | 81846  | Charcot-Marie-Tooth disease, type 4B2, 604563 (3), Autosomal recessive; Charcot-Marie-Tooth disease 4b2                                                                                                                                                                                                                           |
| SEC23B | 10483  | Cowden syndrome 7, 616858 (3), Autosomal dominant; Dyserythropoietic anemia, congenital, type II, 224100 (3), Autosomal recessive; Anaemia, dyserythropoietic congenital, type II                                                                                                                                                 |



|         |       |                                                                                                                                                                                                                                                                                                                                                                                                                                                                                                                  |
|---------|-------|------------------------------------------------------------------------------------------------------------------------------------------------------------------------------------------------------------------------------------------------------------------------------------------------------------------------------------------------------------------------------------------------------------------------------------------------------------------------------------------------------------------|
| SETBP1  | 26040 | Mental retardation, autosomal dominant 29, 616078 (3), Autosomal dominant; Schinzel-Giedion midface retraction syndrome, 269150 (3), Autosomal dominant; Developmental delay                                                                                                                                                                                                                                                                                                                                     |
| SF1     | 7536  |                                                                                                                                                                                                                                                                                                                                                                                                                                                                                                                  |
| SF3A1   | 10291 |                                                                                                                                                                                                                                                                                                                                                                                                                                                                                                                  |
| SF3B1   | 23451 | Myelodysplastic syndrome, somatic, 614286 (3); Myelodysplastic syndrome, somatic, 614286 (3); Miller-Dieker lissencephaly syndrome, 247200 (4), Autosomal dominant; ; Bohring-Opitz syndrome, 605039 (3), Autosomal dominant; Myelodysplastic syndrome, somatic, 614286 (3)                                                                                                                                                                                                                                      |
| SH2B3   | 10019 | Erythrocytosis, somatic, 133100 (3); Myelofibrosis, somatic, 254450 (3); Thrombocythemia, somatic, 187950 (3); Celiac disease, association with                                                                                                                                                                                                                                                                                                                                                                  |
| SH2D1A  | 4068  | Lymphoproliferative syndrome, X-linked, 1, 308240 (3), X-linked recessive; Lymphoproliferative syndrome, X-linked                                                                                                                                                                                                                                                                                                                                                                                                |
| SLC37A4 | 2542  | Glycogen storage disease Ib, 232220 (3), Autosomal recessive; Glycogen storage disease Ic, 232240 (3), Autosomal recessive                                                                                                                                                                                                                                                                                                                                                                                       |
| SLX4    | 84464 | Fanconi anemia, complementation group P, 613951 (3), Autosomal recessive; Breast and/or ovarian cancer                                                                                                                                                                                                                                                                                                                                                                                                           |
| SMC1A   | 8243  | Cornelia de Lange syndrome 2, 300590 (3), X-linked dominant; Cornelia de Lange syndrome                                                                                                                                                                                                                                                                                                                                                                                                                          |
| SMC3    | 9126  | Cornelia de Lange syndrome 3, 610759 (3), Autosomal dominant; Cornelia de Lange syndrome                                                                                                                                                                                                                                                                                                                                                                                                                         |
| SOS1    | 6654  | ?Fibromatosis, gingival, 1, 135300 (3), Autosomal dominant; Noonan syndrome 4, 610733 (3), Autosomal dominant; Anemia, X-linked, with/without neutropenia and/or platelet abnormalities, 300835 (3), X-linked recessive; Leukemia, megakaryoblastic, with or without Down syndrome, somatic, 190685 (3); Thrombocytopenia with beta-thalassemia, X-linked, 314050 (3), X-linked recessive; Thrombocytopenia, X-linked, with or without dyserythropoietic anemia, 300367 (3), X-linked recessive; Noonan syndrome |
| SRP72   | 6731  | Bone marrow failure syndrome 1, 614675 (3), Autosomal dominant; Aplastic anaemia / myelodysplasia                                                                                                                                                                                                                                                                                                                                                                                                                |
| SRSF2   | 6427  | ; RNA binding affinity                                                                                                                                                                                                                                                                                                                                                                                                                                                                                           |
| STAG1   | 10274 |                                                                                                                                                                                                                                                                                                                                                                                                                                                                                                                  |
| STAG2   | 10735 | ; Diaphragmatic hernia, congenital                                                                                                                                                                                                                                                                                                                                                                                                                                                                               |
| STX11   | 8676  | Hemophagocytic lymphohistiocytosis, familial, 4, 603552 (3), Autosomal recessive; Haemophagocytic lymphohistiocytosis, familial                                                                                                                                                                                                                                                                                                                                                                                  |
| STXBP2  | 6813  | Hemophagocytic lymphohistiocytosis, familial, 5, 613101 (3); Hemophagocytic lymphohistiocytosis                                                                                                                                                                                                                                                                                                                                                                                                                  |
| SUZ12   | 23512 |                                                                                                                                                                                                                                                                                                                                                                                                                                                                                                                  |
| SYNE1   | 23345 | Emery-Dreifuss muscular dystrophy 4, autosomal dominant, 612998 (3), Autosomal dominant; Spinocerebellar ataxia, autosomal recessive 8, 610743 (3), Autosomal recessive; Arthrogryposis                                                                                                                                                                                                                                                                                                                          |
| TAZ     | 6901  | Barth syndrome, 302060 (3), X-linked recessive; Barth syndrome                                                                                                                                                                                                                                                                                                                                                                                                                                                   |
| TCIRG1  | 10312 | Osteopetrosis, autosomal recessive 1, 259700 (3), Autosomal recessive; Osteopetrosis, autosomal recessive                                                                                                                                                                                                                                                                                                                                                                                                        |
| TERC    | 7012  | {Aplastic anemia}, 614743 (3), Autosomal dominant; Dyskeratosis congenita, autosomal dominant 1, 127550 (3), Autosomal dominant; {Pulmonary fibrosis, idiopathic, susceptibility to}, 614743 (3), Autosomal dominant; Shorter telomere length, association with                                                                                                                                                                                                                                                  |

|        |        |                                                                                                                                                                                                                                                                                                                                                                                                                                                                                                                                                                                                                                                                                            |
|--------|--------|--------------------------------------------------------------------------------------------------------------------------------------------------------------------------------------------------------------------------------------------------------------------------------------------------------------------------------------------------------------------------------------------------------------------------------------------------------------------------------------------------------------------------------------------------------------------------------------------------------------------------------------------------------------------------------------------|
| TERT   | 7015   | {Dyskeratosis congenita, autosomal dominant 2}, 613989 (3), Autosomal recessive, Autosomal dominant; {Dyskeratosis congenita, autosomal recessive 4}, 613989 (3), Autosomal recessive, Autosomal dominant; {Leukemia, acute myeloid}, 601626 (3), Autosomal dominant; {Melanoma, cutaneous malignant, 9}, 615134 (3); {Pulmonary fibrosis and/or bone marrow failure, telomere-related, 1}, 614742 (3), Autosomal dominant; Dyskeratosis congenita                                                                                                                                                                                                                                         |
| TET1   | 80312  | ; Autism                                                                                                                                                                                                                                                                                                                                                                                                                                                                                                                                                                                                                                                                                   |
| TET2   | 54790  | Myelodysplastic syndrome, somatic, 614286 (3); Prostate cancer                                                                                                                                                                                                                                                                                                                                                                                                                                                                                                                                                                                                                             |
| TINF2  | 26277  | Dyskeratosis congenita, autosomal dominant 3, 613990 (3), Autosomal dominant; Revesz syndrome, 268130 (3), Autosomal dominant; Dyskeratosis congenita                                                                                                                                                                                                                                                                                                                                                                                                                                                                                                                                      |
| TP53   | 7157   | Adrenal cortical carcinoma, 202300 (3), Autosomal recessive; {Basal cell carcinoma 7}, 614740 (3); Breast cancer, 114480 (3), Autosomal dominant; Choroid plexus papilloma, 260500 (3), Autosomal dominant; Colorectal cancer, 114500 (3), Autosomal dominant; {Glioma susceptibility 1}, 137800 (3), Autosomal dominant, Somatic mutation; Hepatocellular carcinoma, 114550 (3), Somatic mutation; Li-Fraumeni syndrome, 151623 (3), Autosomal dominant; Nasopharyngeal carcinoma, 607107 (3); Osteosarcoma, 259500 (3), Autosomal recessive; Pancreatic cancer, 260350 (3), Autosomal dominant, Somatic mutation, Multifactorial; Basal cell carcinoma, increased risk, association with |
| TSR2   | 90121  | ?Diamond-Blackfan anemia 14 with mandibulofacial dysostosis, 300946 (3), X-linked recessive; Diamond-Blackfan anaemia with mandibulofacial dystostosis                                                                                                                                                                                                                                                                                                                                                                                                                                                                                                                                     |
| TUBA3C | 7278   |                                                                                                                                                                                                                                                                                                                                                                                                                                                                                                                                                                                                                                                                                            |
| U2AF1  | 7307   |                                                                                                                                                                                                                                                                                                                                                                                                                                                                                                                                                                                                                                                                                            |
| U2AF2  | 11338  |                                                                                                                                                                                                                                                                                                                                                                                                                                                                                                                                                                                                                                                                                            |
| UBE2T  | 29089  | Fanconi anemia, complementation group T, 616435 (3), Autosomal recessive; Breast cancer                                                                                                                                                                                                                                                                                                                                                                                                                                                                                                                                                                                                    |
| UNC13D | 201294 | Hemophagocytic lymphohistiocytosis, familial, 3, 608898 (3); Haemophagocytic lymphohistiocytosis, familial                                                                                                                                                                                                                                                                                                                                                                                                                                                                                                                                                                                 |
| USB1   | 79650  | Poikiloderma with neutropenia, 604173 (3), Autosomal recessive; Poikiloderma, clericuzio-type with neutropaenia                                                                                                                                                                                                                                                                                                                                                                                                                                                                                                                                                                            |
| VHL    | 7428   | Erythrocytosis, familial, 2, 263400 (3), Autosomal recessive; Hemangioblastoma, cerebellar, somatic (3); Pheochromocytoma, 171300 (3), Autosomal dominant; Renal cell carcinoma, somatic, 144700 (3); von Hippel-Lindau syndrome, 193300 (3), Autosomal dominant; Von Hippel-Lindau syndrome                                                                                                                                                                                                                                                                                                                                                                                               |
| VPS13B | 157680 | Cohen syndrome, 216550 (3), Autosomal recessive; Cohen syndrome                                                                                                                                                                                                                                                                                                                                                                                                                                                                                                                                                                                                                            |
| VPS45  | 11311  | Neutropenia, severe congenital, 5, autosomal recessive, 615285 (3), Autosomal recessive; Neutropaenia, thrombasthenia & myelofibrosis of infancy                                                                                                                                                                                                                                                                                                                                                                                                                                                                                                                                           |
| WAS    | 7454   | Neutropenia, severe congenital, X-linked, 300299 (3), X-linked recessive; Thrombocytopenia, X-linked, 313900 (3), X-linked recessive; Thrombocytopenia, X-linked, intermittent, 313900 (3), X-linked recessive; Wiskott-Aldrich syndrome, 301000 (3), X-linked recessive; Wiskott-Aldrich syndrome                                                                                                                                                                                                                                                                                                                                                                                         |
| WRAP53 | 55135  | Dyskeratosis congenita, autosomal recessive 3, 613988 (3), Autosomal recessive; Dyskeratosis congenita                                                                                                                                                                                                                                                                                                                                                                                                                                                                                                                                                                                     |

|       |      |                                                                                                                                                                                                                                                                                                                                                                  |
|-------|------|------------------------------------------------------------------------------------------------------------------------------------------------------------------------------------------------------------------------------------------------------------------------------------------------------------------------------------------------------------------|
| WT1   | 7490 | Denys-Drash syndrome, 194080 (3), Autosomal dominant, Somatic mutation; Frasier syndrome, 136680 (3), Autosomal dominant, Somatic mutation; Meacham syndrome, 608978 (3); Mesothelioma, somatic, 156240 (3); Nephrotic syndrome, type 4, 256370 (3), Autosomal dominant; Wilms tumor, type 1, 194070 (3), Autosomal dominant, Somatic mutation; Frasier syndrome |
| XIAP  | 331  | Lymphoproliferative syndrome, X-linked, 2, 300635 (3); XIAP deficiency                                                                                                                                                                                                                                                                                           |
| XRCC2 | 7516 | ; Breast cancer                                                                                                                                                                                                                                                                                                                                                  |
| ZRSR2 | 8233 | ; Intellectual disability, X-linked                                                                                                                                                                                                                                                                                                                              |

---
