# Supplementary material for: Targeted next generation sequencing can serve as an alternative to conventional tests in myeloid neoplasms
Source: PubMed Central journal article supplement (PMC6402635; doi:10.1371/journal.pone.0212228), 2019-03-06
Supplement: pone.0212228.s002.pdf [file pone.0212228.s002.pdf]

**S2 Table. List of intronic breakpoint regions for translocation detection and deep intronic regions with pathogenic mutations implicated**

| gene           | Target                                    | Type                                | chrom | start     | end       | size (bp) |
|----------------|-------------------------------------------|-------------------------------------|-------|-----------|-----------|-----------|
| <i>KMT2A</i>   | introns 8-13 (MLL-PTD, MLL translocation) | intronic breakpoints                | 11    | 118352807 | 118360844 | 8038      |
| <i>TERT</i>    | promoter                                  | deep intron mutation site (HGMD)    | 5     | 1295161   | 1295250   | 90        |
| <i>UNC13D</i>  | intron 1                                  | deep intron mutation site (HGMD)    | 17    | 73839908  | 73839908  | 1         |
| <i>ANKRD26</i> | 5'UTR                                     | deep intron mutation site (HGMD)    | 10    | 27389256  | 27389427  | 172       |
| <i>GATA2</i>   | intron 5 enhancer                         | deep intron mutation site (HGMD)    | 3     | 128202118 | 128202197 | 80        |
| <i>TERC</i>    | all noncoding region                      | deep intron mutation site (ClinVar) | 3     | 169482398 | 169482848 | 451       |
| <i>PDGFRB</i>  | introns 8-13                              | intronic breakpoints                | 5     | 149503923 | 149511542 | 7620      |
| <i>PDGFRA</i>  | intron 11                                 | intronic breakpoints                | 4     | 55140698  | 55141140  | 443       |
| <i>FGFR1</i>   | intron 9                                  | intronic breakpoints                | 8     | 38275746  | 38277253  | 1508      |
| <i>JAK2</i>    | introns 7-19 (PCMI/JAK2, ETV6/JAK2)       | intronic breakpoints                | 9     | 5054884   | 5081725   | 26842     |
| <i>RUNX1</i>   | intron 6 (RUNX1/RUNX1T1)                  | intronic breakpoints                | 21    | 36206898  | 36231771  | 24874     |
| <i>RARA</i>    | intron 2 (PML/RARA)                       | intronic breakpoints                | 17    | 38487448  | 38504716  | 17269     |
| <i>MYH11</i>   | introns 27-33 (CBFB/MYH11)                | intronic breakpoints                | 16    | 15814008  | 15826565  | 12558     |
| <i>NUP214</i>  | intron 17 (DEK/NUP214)                    | intronic breakpoints                | 9     | 134027123 | 134034873 | 7751      |
| <i>RBM15</i>   | RBM15/MKL1                                | intronic breakpoints                | 1     | 110881945 | 110889303 | 7359      |
| <i>RBM8A</i>   | NM_005105:c.-21G>A                        | deep intron mutation site (ClinVar) | 1     | 145507646 | 145507646 | 1         |
| <i>RBM8A</i>   | NM_005105:c.67+32G>C                      | deep intron mutation site (ClinVar) | 1     | 145507765 | 145507765 | 1         |
| <i>RBM8A</i>   | NM_005105:c.67+93A>T                      | deep intron mutation site (ClinVar) | 1     | 145507826 | 145507826 | 1         |
| <i>DCLRE1C</i> | NM_001033855:c.973-1777G>C                | deep intron mutation site (HGMD)    | 10    | 14966845  | 14966845  | 1         |
| <i>ANKRD26</i> | NM_014915:c.-134G>A                       | deep intron mutation site (ClinVar) | 10    | 27389389  | 27389389  | 1         |
| <i>PTEN</i>    | NM_000314:c.-861G>T                       | deep intron mutation site (ClinVar) | 10    | 89623365  | 89623365  | 1         |
| <i>PTEN</i>    | NM_000314:c.-764G>A                       | deep intron mutation site (ClinVar) | 10    | 89623462  | 89623462  | 1         |
| <i>PTEN</i>    | NM_000314:c.254-21G>C                     | deep intron mutation site (HGMD)    | 10    | 89692749  | 89692749  | 1         |
| <i>ATM</i>     | NM_000051:c.1236-404C>T                   | deep intron mutation site (HGMD)    | 11    | 108121024 | 108121024 | 1         |
| <i>ATM</i>     | NM_000051:c.2639-384A>G                   | deep intron mutation site (HGMD)    | 11    | 108138753 | 108138753 | 1         |
| <i>ATM</i>     | NM_000051:c.2839-581_2839-578delGTAA      | deep intron mutation site (ClinVar) | 11    | 108141210 | 108141210 | 1         |
| <i>ATM</i>     | NM_000051:c.3994-159A>G                   | deep intron mutation site (HGMD)    | 11    | 108158168 | 108158168 | 1         |
| <i>ATM</i>     | NM_000051:c.5763-1050A>G                  | deep intron mutation site (HGMD)    | 11    | 108179837 | 108179837 | 1         |
| <i>HBB</i>     | NM_000518:c.*110_*114delTAAAA             | deep intron mutation site (ClinVar) | 11    | 5246714   | 5246714   | 1         |
| <i>HBB</i>     | NM_000518:c.*113A>G                       | deep intron mutation site (ClinVar) | 11    | 5246715   | 5246715   | 1         |
| <i>HBB</i>     | NM_000518:c.*112A>G                       | deep intron mutation site (ClinVar) | 11    | 5246716   | 5246716   | 1         |
| <i>HBB</i>     | NM_000518:c.*111A>G                       | deep intron mutation site (ClinVar) | 11    | 5246717   | 5246717   | 1         |
| <i>HBB</i>     | NM_000518:c.*110T>C                       | deep intron mutation site (ClinVar) | 11    | 5246718   | 5246718   | 1         |
| <i>HBB</i>     | NM_000518:c.316-90A>G                     | deep intron mutation site (HGMD)    | 11    | 5247046   | 5247046   | 1         |

|               |                         |                                     |    |          |          |   |
|---------------|-------------------------|-------------------------------------|----|----------|----------|---|
| <i>HBB</i>    | NM_000518:c.316-106C>G  | deep intron mutation site (ClinVar) | 11 | 5247062  | 5247062  | 1 |
| <i>HBB</i>    | NM_000518:c.316-125A>G  | deep intron mutation site (HGMD)    | 11 | 5247081  | 5247081  | 1 |
| <i>HBB</i>    | NM_000518:c.316-146T>G  | deep intron mutation site (ClinVar) | 11 | 5247102  | 5247102  | 1 |
| <i>HBB</i>    | NM_000518:c.316-197C>T  | deep intron mutation site (ClinVar) | 11 | 5247153  | 5247153  | 1 |
| <i>HBB</i>    | NM_000518:c.316-238C>T  | deep intron mutation site (HGMD)    | 11 | 5247194  | 5247194  | 1 |
| <i>HBB</i>    | NM_000518:c.316-260T>C  | deep intron mutation site (HGMD)    | 11 | 5247216  | 5247216  | 1 |
| <i>HBB</i>    | NM_000518:c.93-21G>A    | deep intron mutation site (ClinVar) | 11 | 5248050  | 5248050  | 1 |
| <i>HBB</i>    | NM_000518:c.93-23T>C    | deep intron mutation site (HGMD)    | 11 | 5248052  | 5248052  | 1 |
| <i>HBB</i>    | NM_000518:c.-50A>C      | deep intron mutation site (ClinVar) | 11 | 5248301  | 5248301  | 1 |
| <i>HBB</i>    | NM_000518:c.-78A>G      | deep intron mutation site (ClinVar) | 11 | 5248329  | 5248329  | 1 |
| <i>HBB</i>    | NM_000518:c.-50-29A>G   | deep intron mutation site (ClinVar) | 11 | 5248330  | 5248330  | 1 |
| <i>HBB</i>    | NM_000518:c.-80T>A      | deep intron mutation site (ClinVar) | 11 | 5248331  | 5248331  | 1 |
| <i>HBB</i>    | NM_000518:c.-81A>G      | deep intron mutation site (ClinVar) | 11 | 5248332  | 5248332  | 1 |
| <i>HBB</i>    | NM_000518:c.-82C>A      | deep intron mutation site (ClinVar) | 11 | 5248333  | 5248333  | 1 |
| <i>HBB</i>    | NM_000518:c.-136C>T     | deep intron mutation site (ClinVar) | 11 | 5248387  | 5248387  | 1 |
| <i>HBB</i>    | NM_000518:c.-137C>T     | deep intron mutation site (ClinVar) | 11 | 5248388  | 5248388  | 1 |
| <i>HBB</i>    | NM_000518:c.-50-88C>T   | deep intron mutation site (ClinVar) | 11 | 5248389  | 5248389  | 1 |
| <i>HBB</i>    | NM_000518:c.-140C>T     | deep intron mutation site (ClinVar) | 11 | 5248391  | 5248391  | 1 |
| <i>HBB</i>    | NM_000518:c.-50-92C>T   | deep intron mutation site (ClinVar) | 11 | 5248393  | 5248393  | 1 |
| <i>HBB</i>    | NM_000518:c.-50-101C>T  | deep intron mutation site (ClinVar) | 11 | 5248402  | 5248402  | 1 |
| <i>TCIRG1</i> | NM_006019:c.1887+132T>C | deep intron mutation site (HGMD)    | 11 | 67816893 | 67816893 | 1 |
| <i>TCIRG1</i> | NM_006019:c.1887+142T>A | deep intron mutation site (HGMD)    | 11 | 67816903 | 67816903 | 1 |
| <i>TCIRG1</i> | NM_006019:c.1887+146G>A | deep intron mutation site (HGMD)    | 11 | 67816907 | 67816907 | 1 |
| <i>TCIRG1</i> | NM_006019:c.1887+149C>T | deep intron mutation site (HGMD)    | 11 | 67816910 | 67816910 | 1 |
| <i>PTPN11</i> | NM_002834:c.934-59T>A   | deep intron mutation site (HGMD)    | 12 | 11291560 | 11291560 | 1 |
| <i>PTPN11</i> | NM_080601:c.*2403A>G    | deep intron mutation site (ClinVar) | 12 | 11292684 | 11292684 | 1 |
| <i>PTPN11</i> | NM_080601:c.*2414C>G    | deep intron mutation site (ClinVar) | 12 | 11292685 | 11292685 | 1 |
| <i>PTPN11</i> | NM_080601:c.*2445G>A    | deep intron mutation site (ClinVar) | 12 | 11292688 | 11292688 | 1 |
| <i>PTPN11</i> | NM_080601:c.*2451G>A    | deep intron mutation site (ClinVar) | 12 | 11292688 | 11292688 | 1 |
| <i>KRAS</i>   | NM_033360:c.*22C>G      | deep intron mutation site (ClinVar) | 12 | 25362828 | 25362828 | 1 |
| <i>BRCA2</i>  | NM_000059:c.6937+594T>G | deep intron mutation site (HGMD)    | 13 | 32919384 | 32919384 | 1 |
| <i>BRCA2</i>  | NM_000059:c.7008-62A>G  | deep intron mutation site (HGMD)    | 13 | 32928936 | 32928936 | 1 |
| <i>BRCA2</i>  | NM_000059:c.9502-28A>G  | deep intron mutation site (HGMD)    | 13 | 32971007 | 32971007 | 1 |
| <i>RB1</i>    | NM_000321:c.-198G>A     | deep intron mutation site (ClinVar) | 13 | 48877851 | 48877851 | 1 |
| <i>RB1</i>    | NM_000321:c.-189G>T     | deep intron mutation site (ClinVar) | 13 | 48877860 | 48877860 | 1 |
| <i>RB1</i>    | NM_000321:c.861+828T>G  | deep intron mutation site (HGMD)    | 13 | 48937921 | 48937921 | 1 |
| <i>RB1</i>    | NM_000321:c.1215+63T>G  | deep intron mutation site (HGMD)    | 13 | 48947691 | 48947691 | 1 |

|               |                              |                                     |    |          |          |   |
|---------------|------------------------------|-------------------------------------|----|----------|----------|---|
| <i>RB1</i>    | NM_000321:c.2490-1398A>G     | deep intron mutation site (ClinVar) | 13 | 49046098 | 49046098 | 1 |
| <i>RB1</i>    | NM_000321:c.2490-26A>C       | deep intron mutation site (HGMD)    | 13 | 49047470 | 49047470 | 1 |
| <i>FANCI</i>  | NM_001113378:c.1583+142C>T   | deep intron mutation site (HGMD)    | 15 | 89825208 | 89825208 | 1 |
| <i>FANCA</i>  | NM_000135:c.3239+82T>G       | deep intron mutation site (HGMD)    | 16 | 89816056 | 89816056 | 1 |
| <i>FANCA</i>  | NM_000135:c.2982-192A>G      | deep intron mutation site (HGMD)    | 16 | 89818822 | 89818822 | 1 |
| <i>FANCA</i>  | NM_000135:c.2778+83C>G       | deep intron mutation site (HGMD)    | 16 | 89831215 | 89831215 | 1 |
| <i>FANCA</i>  | NM_000135:c.2504+134A>G      | deep intron mutation site (HGMD)    | 16 | 89836111 | 89836111 | 1 |
| <i>FANCA</i>  | NM_000135:c.2223-138A>G      | deep intron mutation site (HGMD)    | 16 | 89836805 | 89836805 | 1 |
| <i>FANCA</i>  | NM_000135:c.893+920C>A       | deep intron mutation site (HGMD)    | 16 | 89864654 | 89864654 | 1 |
| <i>NF1</i>    | NM_000267:c.61-7486G>T       | deep intron mutation site (HGMD)    | 17 | 29475515 | 29475515 | 1 |
| <i>NF1</i>    | NM_000267:c.288+2025T>G      | deep intron mutation site (HGMD)    | 17 | 29488136 | 29488136 | 1 |
| <i>NF1</i>    | NM_000267:c.888+651T>A       | deep intron mutation site (HGMD)    | 17 | 29510334 | 29510334 | 1 |
| <i>NF1</i>    | NM_000267:c.888+744A>G       | deep intron mutation site (HGMD)    | 17 | 29510427 | 29510427 | 1 |
| <i>NF1</i>    | NM_000267:c.1062+113A>G      | deep intron mutation site (HGMD)    | 17 | 29527726 | 29527726 | 1 |
| <i>NF1</i>    | NM_000267:c.1260+1604A>G     | deep intron mutation site (HGMD)    | 17 | 29530107 | 29530107 | 1 |
| <i>NF1</i>    | NM_000267:c.1393-592A>G      | deep intron mutation site (HGMD)    | 17 | 29540877 | 29540877 | 1 |
| <i>NF1</i>    | NM_000267:c.1527+1159C>T     | deep intron mutation site (HGMD)    | 17 | 29542762 | 29542762 | 1 |
| <i>NF1</i>    | NM_000267:c.1642-449A>G      | deep intron mutation site (HGMD)    | 17 | 29548419 | 29548419 | 1 |
| <i>NF1</i>    | NM_000267:c.1721+542A>G      | deep intron mutation site (HGMD)    | 17 | 29549489 | 29549489 | 1 |
| <i>NF1</i>    | NM_000267:c.3198-314G>A      | deep intron mutation site (HGMD)    | 17 | 29558777 | 29558777 | 1 |
| <i>NF1</i>    | NM_000267:c.3974+260T>G      | deep intron mutation site (HGMD)    | 17 | 29563299 | 29563299 | 1 |
| <i>NF1</i>    | NM_000267:c.4110+945A>G      | deep intron mutation site (HGMD)    | 17 | 29577082 | 29577082 | 1 |
| <i>NF1</i>    | NM_001042492:c.4173+278A>G   | deep intron mutation site (HGMD)    | 17 | 29580296 | 29580296 | 1 |
| <i>NF1</i>    | NM_000267:c.5749+332A>G      | deep intron mutation site (ClinVar) | 17 | 29657848 | 29657848 | 1 |
| <i>NF1</i>    | NM_000267:c.5750-279A>G      | deep intron mutation site (HGMD)    | 17 | 29661577 | 29661577 | 1 |
| <i>NF1</i>    | NM_000267:c.7908-321C>G      | deep intron mutation site (HGMD)    | 17 | 29685177 | 29685177 | 1 |
| <i>NF1</i>    | NM_000267:c.8050+25A>T       | deep intron mutation site (HGMD)    | 17 | 29685665 | 29685665 | 1 |
| <i>BRCA1</i>  | NM_007294:c.*102_*105delCTGT | deep intron mutation site (ClinVar) | 17 | 41197590 | 41197590 | 1 |
| <i>BRCA1</i>  | NM_007294:c.5468-40T>A       | deep intron mutation site (ClinVar) | 17 | 41197859 | 41197859 | 1 |
| <i>BRCA1</i>  | NM_007294:c.4358-2786G>A     | deep intron mutation site (ClinVar) | 17 | 41231417 | 41231417 | 1 |
| <i>BRIP1</i>  | NM_032043:c.1629-498A>T      | deep intron mutation site (HGMD)    | 17 | 59858864 | 59858864 | 1 |
| <i>UNC13D</i> | NM_199242:c.118-308C>T       | deep intron mutation site (HGMD)    | 17 | 73839908 | 73839908 | 1 |
| <i>TP53</i>   | NM_000546:c.673-39G>A        | deep intron mutation site (HGMD)    | 17 | 7577647  | 7577647  | 1 |
| <i>TP53</i>   | NM_000546:c.97-28T>A         | deep intron mutation site (HGMD)    | 17 | 7579618  | 7579618  | 1 |
| <i>FANCL</i>  | NM_018062:c.375-2033C>G      | deep intron mutation site (HGMD)    | 2  | 58433394 | 58433394 | 1 |
| <i>SEC23B</i> | NM_006363:c.221+31A>G        | deep intron mutation site (HGMD)    | 20 | 18491731 | 18491731 | 1 |
| <i>SEC23B</i> | NM_006363:c.221+163A>G       | deep intron mutation site (HGMD)    | 20 | 18491863 | 18491863 | 1 |

|               |                          |                                     |    |               |               |   |
|---------------|--------------------------|-------------------------------------|----|---------------|---------------|---|
| <i>SEC23B</i> | NM_006363:c.222-78C>T    | deep intron mutation site (HGMD)    | 20 | 18492791      | 18492791      | 1 |
| <i>SEC23B</i> | NM_006363:c.1743+168A>G  | deep intron mutation site (HGMD)    | 20 | 18526845      | 18526845      | 1 |
| <i>ADA</i>    | NM_000022:c.976-34G>A    | deep intron mutation site (HGMD)    | 20 | 43249076      | 43249076      | 1 |
| <i>FANCD2</i> | NM_033084:c.696-121C>G   | deep intron mutation site (HGMD)    | 3  | 10083186      | 10083186      | 1 |
| <i>VHL</i>    | NM_000551:c.-75_-55del21 | deep intron mutation site (ClinVar) | 3  | 10183457      | 10183457      | 1 |
| <i>GATA2</i>  | NM_032638:c.1017+572C>T  | deep intron mutation site (HGMD)    | 3  | 12820213      | 12820213      | 1 |
| <i>ATR</i>    | NM_001184:c.6897+464C>G  | deep intron mutation site (ClinVar) | 3  | 14218470<br>2 | 14218470<br>2 | 1 |
| <i>CDKN2A</i> | NM_000077:c.458-105A>G   | deep intron mutation site (HGMD)    | 9  | 21968346      | 21968346      | 1 |
| <i>CDKN2A</i> | NM_000077:c.151-1104C>G  | deep intron mutation site (HGMD)    | 9  | 21972311      | 21972311      | 1 |
| <i>CDKN2A</i> | NM_000077:c.150+1104C>A  | deep intron mutation site (HGMD)    | 9  | 21973573      | 21973573      | 1 |
| <i>CDKN2A</i> | NM_000077:c.-34G>T       | deep intron mutation site (ClinVar) | 9  | 21974860      | 21974860      | 1 |
| <i>TAZ</i>    | NM_000116:c.284+110G>A   | deep intron mutation site (HGMD)    | X  | 15364169<br>9 | 15364169<br>9 | 1 |
| <i>TAZ</i>    | NM_181312:c.541+122G>A   | deep intron mutation site (ClinVar) | X  | 15364808<br>4 | 15364808<br>4 | 1 |
