# Supplementary material for: Targeted next generation sequencing can serve as an alternative to conventional tests in myeloid neoplasms
Source: PubMed Central journal article supplement (PMC6402635; doi:10.1371/journal.pone.0212228), 2019-03-06
Supplement: pone.0212228.s003.pdf [file pone.0212228.s003.pdf]

**S3 Table. List of high-depth target regions**

| <b>Gene</b>   | <b>Region</b>          |
|---------------|------------------------|
| <i>CSF3R</i>  | p.T618                 |
| <i>MPL</i>    | p.W515                 |
| <i>KRAS</i>   | codon 12-13,and 61     |
| <i>NRAS</i>   | codon 12-13,and 61     |
| <i>JAK2</i>   | p.V617 and exon 12     |
| <i>FLT3</i>   | exon 14-15 and p.D835  |
| <i>IDH1</i>   | exon 4                 |
| <i>IDH2</i>   | exon 4                 |
| <i>CALR</i>   | exon 9                 |
| <i>SF3B1</i>  | exon 14-16             |
| <i>ASXL1</i>  | exon 12                |
| <i>NPM1</i>   | exon 11                |
| <i>KIT</i>    | exon 2,8-11,13, and 17 |
| <i>BRAF</i>   | p.V600                 |
| <i>WT1</i>    | exon 7 and 9           |
| <i>TP53</i>   | all coding exons       |
| <i>CEBPA</i>  | all coding exons       |
| <i>DNMT3A</i> | all coding exons       |
