# Supplementary material for: Targeted next generation sequencing can serve as an alternative to conventional tests in myeloid neoplasms
Source: PubMed Central journal article supplement (PMC6402635; doi:10.1371/journal.pone.0212228), 2019-03-06
Supplement: pone.0212228.s004.pdf [file pone.0212228.s004.pdf]

**S4 Table. List of variants identified**

| ID | Disease | Gene            | position                  |                      | VAF  |
|----|---------|-----------------|---------------------------|----------------------|------|
| 1  | AML     | <i>DNMT3A</i>   | c.2644C>T                 | p.Arg882Cys          | 0.47 |
| 1  | AML     | <i>NPM1</i>     | c.860_863dupTCTG          |                      | 0.36 |
| 1  | AML     | <i>KMT2A</i>    | c.7443-1G>T               |                      | 0.18 |
| 2  | AML     | <i>DNMT3A</i>   | c.2645G>A                 | p.Arg882His          | 0.43 |
| 2  | AML     | <i>IDH2</i>     | c.515G>A                  | p.Arg172Lys          | 0.48 |
| 3  | AML     | <i>ASXL1</i>    | c.2385delC                | p.Trp796GlyfsTer22   | 0.32 |
| 3  | AML     | <i>IDH1</i>     | c.394C>T                  | p.Arg132Cys          | 0.17 |
| 3  | AML     | <i>STAG2</i>    | c.768delT                 | p.Ile256MetfsTer9    | 0.33 |
| 4  | AML     | <i>DNMT3A</i>   | c.1851+1G>A               |                      | 0.36 |
| 4  | AML     | <i>IDH1</i>     | c.394C>T                  | p.Arg132Cys          | 0.36 |
| 5  | AML     | <i>ASXL1</i>    | c.1934dupG                | p.Gly646TrpfsTer12   | 0.39 |
| 5  | AML     | <i>CEBPA</i>    | c.934C>T                  | p.Gln312Ter          | 0.5  |
| 5  | AML     | <i>CEBPA</i>    | c.107delG                 | p.Gly36AlafsTer124   | 0.51 |
| 5  | AML     | <i>TET2</i>     | c.4030dupG                | p.Ala1344GlyfsTer3   | 0.46 |
| 5  | AML     | <i>ATM</i>      | c.5288_5289insGA          | p.Tyr1763Ter         | 0.52 |
| 5  | AML     | <i>KMT2A</i>    | c.7443-1G>T               |                      | 0.2  |
| 6  | AML     | <i>ASXL1</i>    | c.1900_1922del            | p.Glu635ArgfsTer15   | 0.24 |
| 6  | AML     | <i>IDH2</i>     | c.419G>A                  | p.Arg140Gln          | 0.48 |
| 6  | AML     | <i>RUNX1</i>    | c.1174C>T                 | p.Gln392Ter          | 0.88 |
| 6  | AML     | <i>STAG2</i>    | c.394dupA                 | p.Thr132AsnfsTer6    | 0.96 |
| 6  | AML     | <i>STAG2</i>    | c.1907dupA                | p.Tyr636Ter          | 0.11 |
| 6  | AML     | <i>CREBBP</i>   | c.5301dupA                | p.Arg1768ThrfsTer198 | 0.43 |
| 7  | AML     | <i>DNMT3A</i>   | c.1979dupA                | p.Tyr660Ter          | 0.14 |
| 7  | AML     | <i>WT1</i>      | c.1108_1109insT           | p.Arg370LeufsTer15   | 0.14 |
| 7  | AML     | <i>NPM1</i>     | c.860_863dupTCTG          | p.Trp288CysfsTer12   | 0.34 |
| 8  | AML     | <i>DNMT3A</i>   | c.2645G>A                 | p.Arg882His          | 0.41 |
| 8  | AML     | <i>NPM1</i>     | c.860_863dupTCTG          | p.Trp288CysfsTer12   | 0.34 |
| 9  | AML     | <i>WT1</i>      | c.353C>A                  | p.Ser118Ter          | 0.56 |
| 9  | AML     | <i>KDM6A</i>    | c.3338_3342delTATCA       | p.Val1113GlyfsTer36  | 0.49 |
| 9  | AML     | <i>PHF6</i>     | c.279_291delTTGTGATGTGAAA | p.Cys94HisfsTer45    | 0.44 |
| 9  | AML     | <i>SH2B3</i>    | c.1038dupG                | p.Leu347AlafsTer38   | 0.86 |
| 9  | AML     | <i>SUZ12</i>    | c.1023+1G>A               |                      | 0.32 |
| 10 | AML     | <i>NPM1</i>     | c.860_863dupTCTG          |                      | 0.37 |
| 10 | AML     | <i>TET2</i>     | c.3500+2T>C               |                      | 0.44 |
| 11 | AML     | <i>NRAS</i>     | c.35G>A                   | p.Gly12Asp           | 0.11 |
| 11 | AML     | <i>EZH2</i>     | c.684dupC                 | p.Ser229LeufsTer6    | 0.37 |
| 12 | AML     | <i>WT1</i>      | c.1394A>G                 | p.His465Arg          | 0.59 |
| 12 | AML     | <i>NRAS</i>     | c.35G>A                   | p.Gly12Asp           | 0.36 |
| 13 | AML     | <i>RNF168</i>   | c.225_226insATTCT         | p.Leu76IlefsTer6     | 0.25 |
| 15 | AML     | <i>ASXL1</i>    | c.1720-1G>T               |                      | 0.49 |
| 15 | AML     | <i>TET2</i>     | c.1299dupA                | p.His434ThrfsTer9    | 0.36 |
| 15 | AML     | <i>SH2B3</i>    | c.951_954dupGCAT          | p.Ile319AlafsTer9    | 0.39 |
| 15 | AML     | <i>CUX1</i>     | c.2379delG                | p.Leu794TrpfsTer14   | 0.16 |
| 16 | AML     | <i>IDH2</i>     | c.419G>A                  | p.Arg140Gln          | 0.45 |
| 16 | AML     | <i>NPM1</i>     | c.860_863dupTCTG          |                      | 0.35 |
| 16 | AML     | <i>PTPN11</i>   | c.179G>T                  | p.Gly60Val           | 0.33 |
| 17 | AML     | <i>DNMT3A</i>   | c.2645G>A                 | p.Arg882His          | 0.39 |
| 17 | AML     | <i>FLT3-TKD</i> | c.2503G>C                 | D835H                | 0.4  |

|    |     |                 |                                    |                             |      |
|----|-----|-----------------|------------------------------------|-----------------------------|------|
| 17 | AML | <i>MPL</i>      | c.1069C>T                          | p.Arg357Ter                 | 0.39 |
| 20 | AML | <i>BLM</i>      | c.320dupT                          | p.Leu107PhefsTer36          | 0.49 |
| 22 | AML | <i>RUNX1</i>    | c.893dupC                          | p.Ala299SerfsTer301         | 0.4  |
| 23 | AML | <i>BCOR</i>     | c.1970dupA                         | p.Tyr657Ter                 | 0.82 |
| 24 | AML | <i>CEBPA</i>    | c.322_329dupTACCCGGG               | p.Ala111ThrfsTer52          | 0.31 |
| 24 | AML | <i>VPS13B</i>   | c.762+2T>G                         |                             | 0.59 |
| 25 | AML | <i>CEBPA</i>    | c.209dup                           | p.Ala71GlyfsTer37           | 0.46 |
| 25 | AML | <i>CEBPA</i>    | c.917_934delGCAACGTGGAGACG<br>CAGC | p.Arg306_Gln311del          | 0.25 |
| 26 | AML | <i>NRAS</i>     | c.35G>C                            | p.Gly12Ala                  | 0.16 |
| 27 | AML | <i>KIT</i>      | c.2466T>A                          | p.Asp882Lys                 | 0.43 |
| 27 | AML | <i>KDM6A</i>    | c.3140delT                         | p.Leu1047Ter                | 0.4  |
| 27 | AML | <i>SEC23B</i>   | c.1507C>T                          | p.Arg503Ter                 | 0.48 |
| 28 | AML | <i>LAMB4</i>    | c.3267dupT                         | p.Ser1090Ter                | 0.43 |
| 30 | AML | <i>ASXL1</i>    | c.1934dupG                         | p.Gly646TrpfsTer12          | 0.32 |
| 30 | MDS | <i>FANCA</i>    | c.1A>T                             | p.Met1?                     | 0.46 |
| 31 | AML | <i>CEBPA</i>    | c.68dupC                           | p.His24AlafsTer84           | 0.47 |
| 31 | AML | <i>CEBPA</i>    | c.907_909dupGCC                    | p.Ala303dup                 | 0.45 |
| 32 | AML | <i>CEBPA</i>    | c.241_248delCTGTTCCA               |                             | 0.2  |
| 32 | AML | <i>CEBPA</i>    | c.929_931delCGC                    |                             | 0.28 |
| 32 | AML | <i>CEBPA</i>    | c.925_927delGAG                    |                             | 0.29 |
| 32 | AML | <i>TET2</i>     | c.3247C>T                          | p.Gln1083Ter                | 0.41 |
| 32 | AML | <i>KMT2C</i>    | c.8390dupA                         | p.Glu2798GlyfsTer11         | 0.38 |
| 34 | AML | <i>KIT</i>      | c.2466T>A                          | p.Asp882Lys                 | 0.38 |
| 34 | AML | <i>WRAP53</i>   | c.1564delG                         | p.Ala522ArgfsTer26          | 0.5  |
| 35 | AML | <i>WT1</i>      | c.1105delC                         | p.Arg369AspfsTer6           | 0.35 |
| 35 | AML | <i>WT1</i>      | c.1107_1108insGG                   | p.Arg370GlyfsTer6           | 0.36 |
| 35 | AML | <i>WT1</i>      | c.1101_1102insA                    | p.Val368SerfsTer17          | 0.35 |
| 35 | AML | <i>PTPN11</i>   | c.172A>T                           | p.Asn58Tyr                  | 0.25 |
| 35 | AML | <i>PALB2</i>    | c.1011_1015delACCAG                | p.Leu337PhefsTer3           | 0.44 |
| 37 | AML | <i>CEBPA</i>    | c.759_763delCAAGG                  |                             | 0.34 |
| 37 | AML | <i>WT1</i>      | c.1105C>T                          | p.Arg369Ter                 | 0.51 |
| 37 | AML | <i>WRAP53</i>   | c.1564delG                         | p.Ala522ArgfsTer26          | 0.54 |
| 37 | AML | <i>MPL</i>      | c.972delC                          | p.Arg325GlufsTer44          | 0.53 |
| 38 | AML | <i>PTPN11</i>   | c.226G>A                           | p.Glu76Lys                  | 0.41 |
| 39 | AML | <i>NPM1</i>     | c.860_863dupTCTG                   |                             | 0.21 |
| 39 | AML | <i>WT1</i>      | c.1142_1143insAA                   | p.Ala382ArgfsTer68          | 0.3  |
| 39 | AML | <i>NRAS</i>     | c.38G>A                            | p.Gly13Asp                  | 0.19 |
| 40 | AML | <i>DNMT3A</i>   | c.2645G>A                          | p.Arg882His                 | 0.38 |
| 40 | AML | <i>PHF6</i>     | c.820C>T                           | p.Arg274Ter                 | 0.12 |
| 40 | AML | <i>NF1</i>      | c.2325+1G>C                        |                             | 0.21 |
| 41 | AML | <i>ASXL1</i>    | c.2439delC                         | p.Ile814PhefsTer4           | 0.47 |
| 41 | AML | <i>IDH2</i>     | c.419G>A                           | p.Arg140Gln                 | 0.29 |
| 41 | AML | <i>RUNX1</i>    | c.292delC                          | p.Leu98SerfsTer24           | 0.65 |
| 43 | AML | <i>FLT3-TKD</i> | c.2503G>T                          | D835Y                       | 0.44 |
| 44 | AML | <i>KRAS</i>     | c.34G>T                            | G12C                        | 0.3  |
| 44 | AML | <i>FBXW7</i>    | c.585-1G>T                         |                             | 0.19 |
| 45 | AML | <i>NRAS</i>     | c.35G>T                            | p.Gly12Val                  | 0.44 |
| 47 | AML | <i>NRAS</i>     | c.35G>A                            | p.Gly12Asp                  | 0.2  |
| 49 | AML | <i>ASXL1</i>    | c.1934dupG                         | p.Gly646TrpfsTer12<br>(e13) | 0.28 |
| 49 | AML | <i>TP53</i>     | c.949delC                          | p.Gln317SerfsTer28          | 0.29 |

|    |     |               |                                                                            |                    |      |
|----|-----|---------------|----------------------------------------------------------------------------|--------------------|------|
| 52 | MDS | <i>TP53</i>   | c.372C>A                                                                   | p.Cys124Ter        | 0.38 |
| 52 | MDS | <i>LUC7L2</i> | c.70C>T                                                                    | p.Arg24Ter         | 0.33 |
| 53 | MPN | <i>ASXL1</i>  | c.2077C>T                                                                  | p.Arg693Ter        | 0.3  |
| 53 | MPN | <i>MPL</i>    | c.1543_1544delGTinsAA                                                      | W515K              | 0.71 |
| 54 | MPN | <i>ASXL1</i>  | c.1900_1922delAGAGAGGCGGCC<br>ACCACTGCCAT                                  | p.Glu635ArgfsTer15 | 0.27 |
| 54 | MPN | <i>MPL</i>    | c.1543_1544delGTinsAA                                                      | W515K              | 91   |
| 55 | MPN | <i>TET2</i>   | c.2422delG                                                                 | p.Glu808LysfsTer5  | 38.8 |
| 55 | MPN | <i>CALR</i>   | c.1099_1150delCTTAAGGAGGAGG<br>AAGAAGACAAGAAACGCAAAG<br>AGGAGGAGGAGGCAGAGG | p.Leu367ThrfsTer46 | 18.7 |
| 56 | MPN | <i>JAK2</i>   | c.1849G>T                                                                  | V617F              | 0.45 |
| 57 | MPN | <i>JAK2</i>   | c.1849G>T                                                                  | V617F              | 62.4 |
| 58 | MPN | <i>JAK2</i>   | c.1849G>T                                                                  | V617F              | 0.62 |
| 59 | MPN | <i>ASXL1</i>  | c.1282C>T                                                                  | p.Gln428Ter        | 41.9 |
| 59 | MPN | <i>NRAS</i>   | c.182A>G                                                                   | Q61R               | 13.3 |
| 59 | MPN | <i>SUZ12</i>  | c.1956delA                                                                 | p.Leu652PhefsTer9  | 40.1 |
| 60 | MPN | <i>TET2</i>   | c.4879C>T                                                                  | p.Gln1627Ter       | 0.7  |
| 60 | MPN | <i>CALR</i>   | c.1099_1150delCTTAAGGAGGAGG<br>AAGAAGACAAGAAACGCAAAG<br>AGGAGGAGGAGGCAGAGG | p.Leu367ThrfsTer46 | 0.21 |
| 60 | MPN | <i>UBE2T</i>  | c.109+1G>A                                                                 |                    | 0.49 |
| 61 | MPN | <i>JAK2</i>   | c.1849G>T                                                                  | V617F              | 0.47 |
| 62 | MPN | <i>TET2</i>   | c.3101dupA                                                                 | p.Phe1035ValfsTer8 | 0.41 |
| 62 | MPN | <i>JAK2</i>   | c.1849G>T                                                                  | V617F              | 0.35 |
| 65 | MPN | <i>MPL</i>    | c.1543T>A                                                                  | p.Trp515Arg        | 0.17 |
| 66 | MPN | <i>PALB2</i>  | c.1240C>T                                                                  | p.Arg414Ter        | 40.4 |
| 66 | MPN | <i>JAK2</i>   | c.1849G>T                                                                  | V617F              | 45.4 |
| 68 | MPN | <i>JAK2</i>   | c.1849G>T                                                                  | V617F              | 32.9 |
| 70 | AML | <i>CEBPA</i>  | c.934_939delCAGAAG                                                         |                    | 12.5 |
| 70 | AML | <i>MPL</i>    | c.1069C>T                                                                  | p.Arg357Ter        | 43.9 |
| 71 | AML | <i>NPM1</i>   | c.863_864insCAGA                                                           | p.Trp288CysfsTer12 | 13.2 |
| 71 | AML | <i>TET2</i>   | c.778_779delTT                                                             | p.Leu260ValfsTer3  | 29.7 |
| 72 | AML | <i>ASXL1</i>  | c.1934dupG                                                                 | p.Gly646TrpfsTer12 | 35.5 |
| 72 | AML | <i>XRCC2</i>  | c.398_399delTA                                                             | p.Leu133ArgfsTer6  | 45.1 |
| 73 | AML | <i>KIT</i>    | c.2446G>T                                                                  | D816Y              | 27   |
| 75 | AML | <i>ATR</i>    | c.5900delG                                                                 | p.Gly1967ValfsTer7 | 53.1 |
| 75 | AML | <i>DDX41</i>  | c.1496dupC                                                                 | p.Ala500CysfsTer9  | 47.7 |
| 77 | AML | <i>NRAS</i>   | c.35G>A                                                                    | p.Gly12Asp         | 42.7 |
| 77 | AML | <i>NPM1</i>   | c.860_863dupTCTG                                                           | p.Trp288CysfsTer12 | 31.5 |
| 77 | AML | <i>DNMT3A</i> | c.2207G>A                                                                  | p.Arg736His        | 43.3 |
| 78 | AML | <i>ASXL1</i>  | c.2356dupA                                                                 | p.Arg786LysfsTer3  | 42.2 |
| 78 | AML | <i>IDH1</i>   | c.394C>T                                                                   | p.Arg132Cys        | 35.1 |
| 78 | AML | <i>FAT1</i>   | c.10993C>T                                                                 | p.Arg3665Ter       | 41.9 |
| 69 | MPN | <i>SBDS</i>   | c.258+2T>C                                                                 |                    | 45.9 |
| 79 | MDS | <i>NPM1</i>   | c.860_863dupTCTG                                                           | p.Trp288CysfsTer12 | 27.2 |
| 79 | MDS | <i>BCOR</i>   | c.4640-2A>G                                                                |                    | 65.3 |
| 80 | AML | <i>PTPN11</i> | c.181G>T                                                                   | p.Asp61Tyr         | 9.2  |

|     |     |                |                                                                                 |                                                                                         |      |
|-----|-----|----------------|---------------------------------------------------------------------------------|-----------------------------------------------------------------------------------------|------|
| 81  | AML | <i>GATA1</i>   | c.137_164delCCTCCACTGCCCCGA<br>GCACAGCCACCCG                                    | p.Ser46LeufsTer82                                                                       | 14.7 |
| 81  | AML | <i>BRC A2</i>  | c.8912delA                                                                      | p.Lys2971SerfsTer5                                                                      | 49.9 |
| 81  | AML | <i>EGLN1</i>   | c.2T>G                                                                          | p.Met1?                                                                                 | 4.9  |
| 83  | AML | <i>WT1</i>     | c.1330A>T                                                                       | p.Arg444Ter                                                                             | 3.6  |
| 85  | AML | <i>GATA2</i>   | c.1144-2A>G                                                                     |                                                                                         | 41.2 |
| 85  | AML | <i>NPM1</i>    | c.863_864insCATG                                                                | p.Trp288CysfsTer12                                                                      | 33   |
| 87  | MPN | <i>JAK2</i>    | c.1849G>T                                                                       | p.Val617Phe                                                                             | 38.4 |
| 89  | AML | <i>ASXL1</i>   | c.1925dupG                                                                      | p.Gly643ArgfsTer15                                                                      | 11.2 |
| 89  | AML | <i>ETV6</i>    | c.472_473delGT                                                                  | p.Val158ProfsTer10                                                                      | 43.5 |
| 89  | AML | <i>EZH2</i>    | c.1075A>T                                                                       | p.Arg359Ter                                                                             | 46.2 |
| 89  | AML | <i>NRAS</i>    | c.35G>A                                                                         | p.Gly12Asp                                                                              | 33.5 |
| 90  | AML | <i>ASXL1</i>   | c.2555C>A                                                                       | p.Ser852Ter                                                                             | 42.3 |
| 90  | AML | <i>LUC7L2</i>  | c.727C>T                                                                        | p.Arg243Ter                                                                             | 44.2 |
| 90  | AML | <i>STAG2</i>   | c.418C>T                                                                        | p.Gln140Ter                                                                             | 76.2 |
| 90  | AML | <i>NRAS</i>    | c.181C>A                                                                        | p.Gln61Lys                                                                              | 36.4 |
| 91  | AML | <i>FLT3</i>    | c.1824_1825insGGAAACGTTGATT<br>TCAGAGAATATGAATATGATCT<br>CAAATGGGAGTTTCCAAGAGAA | p.Glu608_Asn609insGly<br>AsnValAspPheArgGlu<br>TyrGluTyrAspLeuLys<br>TrpGluPheProArgGlu | 14.9 |
| 91  | AML | <i>ASXL1</i>   | c.1934dupG                                                                      | p.Gly646TrpfsTer12                                                                      | 35.5 |
| 91  | AML | <i>IDH2</i>    | c.419G>A                                                                        | p.Arg140Gln                                                                             | 44.6 |
| 91  | AML | <i>RUNX1</i>   | c.517_520dupTTCA                                                                | p.Thr174IlefsTer40                                                                      | 45.3 |
| 91  | AML | <i>STAG2</i>   | c.3097C>T                                                                       | p.Arg1033Ter                                                                            | 99.1 |
| 92  | AML | <i>ASXL1</i>   | c.1934dupG                                                                      | p.Gly646TrpfsTer12                                                                      | 36.8 |
| 93  | AML | <i>NPM1</i>    | c.860_863dupTCTG                                                                | p.Trp288CysfsTer12                                                                      | 28.9 |
| 93  | AML | <i>FLT3</i>    | c.1781_1782insTCGACAGGTGACC<br>GGCTCCTCAGATAATGAGTACTT<br>CTACGTTGATTT          | p.Gln580_Arg595dup                                                                      | 10.2 |
| 93  | AML | <i>CEBPA</i>   | c.749_750delG                                                                   | p.Gly250GluTer70                                                                        | 10.7 |
| 93  | AML | <i>CEBPA</i>   | c.932A>C                                                                        | p.Gln311Pro                                                                             | 34.8 |
| 93  | AML | <i>IDH2</i>    | c.419G>A                                                                        | p.Arg140Gln                                                                             | 47.2 |
| 94  | PMN | <i>CALR</i>    | c.1099_1150delCTTAAGGAGGAGG<br>AAGAAGACAAGAAACGCAAAG<br>AGGAGGAGGAGGCAGAGG      | p.Leu367ThrfsTer46                                                                      | 15.1 |
| 95  | AML | <i>FLT3</i>    | FLT3-ITD                                                                        |                                                                                         | 10.3 |
| 96  | AML | <i>WT1</i>     | c.1110dupT                                                                      | p.Val371CysfsTer14                                                                      | 49.3 |
| 96  | AML | <i>PTEN</i>    | c.146dupA                                                                       | p.Asn49LysfsTer3                                                                        | 41.9 |
| 96  | AML | <i>ASXL1</i>   | c.1900_1922delAGAGAGGCGGCC<br>ACCACTGCCAT                                       | p.Glu635ArgfsTer15                                                                      | 11   |
| 97  | AML | <i>NF1</i>     | c.3708+1G>T                                                                     |                                                                                         | 26.8 |
| 97  | AML | <i>IDH2</i>    | c.419G>A                                                                        | p.Arg140Gln                                                                             | 26.6 |
| 98  | AML | <i>BCOR</i>    | c.4072-1G>A                                                                     |                                                                                         | 36.5 |
| 98  | AML | <i>BCOR</i>    | c.4038_4039delAG                                                                | p.Glu1348IlefsTer26                                                                     | 48.6 |
| 98  | AML | <i>RAD21</i>   | c.1161+1G>A                                                                     |                                                                                         | 40.4 |
| 98  | AML | <i>KRAS</i>    | c.38G>A                                                                         | p.Gly13Asp                                                                              | 39   |
| 99  | AML | <i>DCLRE1C</i> | c.1696_1699dupAACA                                                              | p.Ser567LysfsTer12                                                                      |      |
| 99  | AML | <i>DDX41</i>   | c.1496dupC                                                                      | p.Ala500CysfsTer9                                                                       |      |
| 100 | AML | <i>CEBPA</i>   | c.196_199dupGCCT                                                                | p.Tyr67CysfsTer42                                                                       | 40   |
| 100 | AML | <i>CEBPA</i>   | c.866G>C                                                                        | p.Arg289Pro                                                                             | 41.5 |
| 100 | AML | <i>TET2</i>    | c.945delC                                                                       | p.Gln317ArgfsTer30                                                                      | 42.6 |
| 100 | AML | <i>TET2</i>    | c.3247C>T                                                                       | p.Gln1083Ter                                                                            | 41.4 |
| 101 | MPN | <i>JAK2</i>    | c.1849G>T                                                                       | p.Val617Phe                                                                             | 69.9 |

|     |     |               |                                                                              |                                                                |      |
|-----|-----|---------------|------------------------------------------------------------------------------|----------------------------------------------------------------|------|
| 101 | MPN | <i>NF1</i>    | c.3456dupA                                                                   | p.Leu1153ThrfsTer42                                            | 31.5 |
| 103 | MPN | <i>JAK2</i>   | c.1849G>T                                                                    | p.Val617Phe                                                    | 93   |
| 103 | MPN | <i>TET2</i>   | c.5618T>C                                                                    | p.Ile1873Thr                                                   | 42.5 |
| 104 | MPN | <i>JAK2</i>   | c.1849G>T                                                                    | p.Val617Phe                                                    | 17.8 |
| 104 | MPN | <i>ZRSR2</i>  | c.715_716delTT                                                               | p.Phe239LeufsTer2                                              | 89.1 |
| 106 | AML | <i>CEBPA</i>  | c.262C>T                                                                     | p.Gln88Ter                                                     | 17   |
| 106 | AML | <i>CEBPA</i>  | c.914A>C                                                                     | p.Gln305Pro                                                    | 16.1 |
| 106 | AML | <i>NRAS</i>   | c.35G>A                                                                      | p.Gly12Asp                                                     | 17.2 |
| 106 | AML | <i>LAMB4</i>  | c.193-2A>C                                                                   |                                                                | 19.5 |
| 107 | AML | <i>NPM1</i>   | c.860_863dupTCTG                                                             | p.Trp288CysfsTer12                                             | 28.5 |
| 107 | AML | <i>TET2</i>   | c.2964_2974delinsA                                                           | p.Pro989Valfs*15                                               | 22.2 |
| 108 | AML | <i>IDH2</i>   | c.419G>A                                                                     | p.Arg140Gln                                                    | 41.8 |
| 110 | MPN | <i>JAK2</i>   | c.1849G>T                                                                    | p.Val617Phe                                                    |      |
| 111 | MPN | <i>JAK2</i>   | c.1849G>T                                                                    | p.Val617Phe                                                    | 31.9 |
| 111 | MPN | <i>BRCA2</i>  | c.10150C>T                                                                   | p.Arg3384Ter                                                   | 50.2 |
| 112 | MPN | <i>JAK2</i>   | c.1849G>T                                                                    | p.Val617Phe                                                    | 91.5 |
| 112 | MPN | <i>IDH2</i>   | c.419G>A                                                                     | p.Arg140Gln                                                    | 30.1 |
| 113 | MPN | <i>JAK2</i>   | c.1849G>T                                                                    | p.Val617Phe                                                    | 69.4 |
| 113 | MPN | <i>ATRX</i>   | c.3646A>G                                                                    | p.Ile1216Val                                                   | 100  |
| 113 | MPN | <i>ADA</i>    | c.659C>T                                                                     | p.Ser220Leu                                                    | 45   |
| 113 | MPN | <i>BRCA2</i>  | c.8954-5_8954-2delAACA                                                       |                                                                | 44.9 |
| 113 | MPN | <i>DNMT1</i>  | c.81-3delC                                                                   |                                                                | 46.3 |
| 114 | AML | <i>TP53</i>   | c.583delA                                                                    | p.Ile195SerfsTer52                                             | 53.8 |
| 114 | AML | <i>BLM</i>    | c.715G>A                                                                     | p.Asp239Asn                                                    | 44.9 |
| 114 | AML | <i>GNAS</i>   | c.1207_1208insCGACTCCGGGGCG<br>GCCCGTGACGCCAGCCGATC<br>C                     | p.Ile402_Gln403insPro<br>ThrProGlyArgProValT<br>hrProGlnProIle | 23.3 |
| 114 | AML | <i>VPS13B</i> | c.1457T>G                                                                    | p.Leu486Trp                                                    | 54   |
| 114 | AML | <i>STAG2</i>  | c.1388C>T                                                                    | p.Thr463Ile                                                    | 49   |
| 114 | AML | <i>NCOR2</i>  | c.6626C>T                                                                    | p.Thr2209Met                                                   | 42.3 |
| 114 | AML | <i>FLT3</i>   | c.1333_1334delinsTT                                                          | p.Ala445Leu                                                    | 38   |
| 114 | AML | <i>UNC13D</i> | c.2136C>G                                                                    | p.Ile712Met                                                    | 52.3 |
| 115 | AML | <i>FLT3</i>   | c.1740_1793dupGGTGACCGGCTC<br>CTCAGATAATGAGTACTTCTACG<br>TTGATTTCAGAGAATATGA | p.Val581_Glu598dup                                             | 37.4 |
| 115 | AML | <i>CEBPA</i>  | c.713C>A                                                                     | p.Ala238Glu                                                    | 55.6 |
| 115 | AML | <i>CDKN2A</i> | c.38C>A                                                                      | p.Ala13Asp                                                     | 42.7 |
| 115 | AML | <i>NF1</i>    | c.7540A>G                                                                    | p.Thr2514Ala                                                   | 47.9 |
| 115 | AML | <i>SYNE1</i>  | c.11067T>G                                                                   | p.Ile3689Met                                                   | 46.2 |
| 115 | AML | <i>BCORL1</i> | c.4171G>A                                                                    | p.Gly1391Arg                                                   | 48.6 |
| 115 | AML | <i>CREBBP</i> | c.5271C>T                                                                    | p.Gly1757=                                                     | 43.4 |
| 115 | AML | <i>RNF168</i> | c.792A>G                                                                     | p.Pro264=                                                      | 44.8 |
| 116 | AML | <i>CEBPA</i>  | c.103_104insT                                                                | p.Arg35LeufsTer73                                              | 16.6 |
| 116 | AML | <i>IDH2</i>   | c.419G>A                                                                     | p.Arg140Gln                                                    | 17.4 |
| 116 | AML | <i>BLM</i>    | c.1544dupA                                                                   | p.Asn515LysfsTer2                                              | 5.5  |
| 116 | AML | <i>GATA2</i>  | c.961C>T                                                                     | p.Leu321Phe                                                    | 18.2 |
| 116 | AML | <i>NCOR2</i>  | c.4576G>A                                                                    | p.Ala1526Thr                                                   | 61.9 |
| 116 | AML | <i>KMT2C</i>  | c.3401G>A                                                                    | p.Ser1134Asn                                                   | 6.1  |
| 116 | AML | <i>SBF2</i>   | c.1612G>T                                                                    | p.Asp538Tyr                                                    | 50.8 |
| 116 | AML | <i>PCDHB1</i> | c.1591G>C                                                                    | p.Val531Leu                                                    | 54   |
| 116 | AML | <i>SYNE1</i>  | c.19348G>C                                                                   | p.Glu6450Gln                                                   | 53.2 |
| 117 | AML | <i>XIAP</i>   | c.697C>T                                                                     | p.Arg233Trp                                                    | 10.6 |
| 117 | AML | <i>GPRC5A</i> | c.865G>T                                                                     | p.Val289Leu                                                    | 45.2 |

|     |     |                |                                                 |                     |      |
|-----|-----|----------------|-------------------------------------------------|---------------------|------|
| 117 | AML | <i>BLM</i>     | c.2839A>G                                       | p.Ile947Val         | 52.1 |
| 117 | AML | <i>FANCL</i>   | c.335C>T                                        | p.Ser112Leu         | 46   |
| 118 | AML | <i>TP53</i>    | whole gene deletion (homozygous)                |                     |      |
| 118 | AML | <i>SUZ12</i>   | whole gene deletion                             |                     |      |
| 118 | AML | <i>NF1</i>     | c.7330dupA                                      | p.Thr2444AsnfsTer4  | 22.4 |
| 118 | AML | <i>FANCG</i>   | c.637_643delTACCGCC                             | p.Tyr213LysfsTer6   | 16.7 |
| 118 | AML | <i>FAT1</i>    | c.5671C>A                                       | p.Pro1891Thr        | 45.8 |
| 118 | AML | <i>EPOR</i>    | c.1139C>T                                       | p.Pro380Leu         | 48.4 |
| 118 | AML | <i>NOTCH1</i>  | c.5015G>A                                       | p.Arg1672His        | 60   |
| 118 | AML | <i>SLC37A4</i> | c.607G>A                                        | p.Ala203Thr         | 47.1 |
| 118 | AML | <i>FAT1</i>    | c.1244A>G                                       | p.Tyr415Cys         | 49.9 |
| 118 | AML | <i>STX11</i>   | c.668A>C                                        | p.Asp223Ala         | 44   |
| 119 | AML | <i>CEBPA</i>   | c.68dupC                                        | p.His24AlafsTer84   | 33   |
| 119 | AML | <i>CEBPA</i>   | c.907_909dupGCC                                 | p.Ala303dup         | 39.1 |
| 119 | AML | <i>DNMT1</i>   | c.382C>G                                        | p.Pro128Ala         | 51.5 |
| 119 | AML | <i>SYNE1</i>   | c.18467G>T                                      | p.Arg6156Leu        | 45.9 |
| 119 | AML | <i>GATA2</i>   | c.961C>T                                        | p.Leu321Phe         | 40.8 |
| 119 | AML | <i>STXB2</i>   | c.1514C>T                                       | p.Thr505Met         | 46.7 |
| 119 | AML | <i>BRINP3</i>  | c.1207C>G                                       | p.Arg403Gly         | 43.8 |
| 119 | AML | <i>FANCA</i>   | c.953G>T                                        | p.Arg318Met         | 47.4 |
| 119 | AML | <i>FANCA</i>   | c.527C>T                                        | p.Ser176Phe         | 50   |
| 120 | AML | <i>NPM1</i>    | c.863_864insCATG                                | p.Trp288CysfsTer12  | 19.6 |
| 120 | AML | <i>NRAS</i>    | c.182A>G                                        | p.Gln61Arg          | 37.8 |
| 120 | AML | <i>TET2</i>    | c.4877C>A                                       | p.Thr1626Asn        | 45   |
| 120 | AML | <i>NOTCH1</i>  | c.4898G>A                                       | p.Arg1633His        | 51.9 |
| 120 | AML | <i>NTRK3</i>   | c.1028G>A                                       | p.Arg343Gln         | 48.8 |
| 120 | AML | <i>JAK3</i>    | c.637A>T                                        | p.Ile213Phe         | 53.5 |
| 120 | AML | <i>SYNE1</i>   | c.3998G>A                                       | p.Arg1333His        | 45.8 |
| 120 | AML | <i>ABL1</i>    | c.199G>A                                        | p.Val67Ile          | 47.2 |
| 121 | AML | <i>NPM1</i>    | c.860_863dupTCTG                                | p.Trp288CysfsTer12  | 30.4 |
| 121 | AML | <i>PTPN11</i>  | c.1471C>A                                       | p.Pro491Thr         | 35.3 |
| 121 | AML | <i>IDH2</i>    | c.419G>A                                        | p.Arg140Gln         | 42.6 |
| 121 | AML | <i>FLT3</i>    | c.1724A>T                                       | p.Gln575Leu         | 25.9 |
| 122 | AML | <i>BCOR</i>    | c.3646delA                                      | p.Thr1216LeufsTer44 | 37.1 |
| 122 | AML | <i>PTPN11</i>  | c.182A>G                                        | p.Asp61Gly          | 23.8 |
| 122 | AML | <i>ETV6</i>    | c.1141G>A                                       | p.Gly381Arg         | 31   |
| 122 | AML | <i>EGFR</i>    | c.716G>C                                        | p.Gly239Ala         | 50.9 |
| 122 | AML | <i>XRCC2</i>   | c.772C>T                                        | p.Arg258Cys         | 50.4 |
| 123 | AML | <i>EGFR</i>    | c.2270A>G                                       | p.Lys757Arg         | 46.2 |
| 123 | AML | <i>FAT1</i>    | c.7591A>G                                       | p.Ile2531Val        | 52.2 |
| 123 | AML | <i>KMT2C</i>   | c.1181G>A                                       | p.Cys394Tyr         | 6.7  |
| 123 | AML | <i>CREBBP</i>  | c.743C>T                                        | p.Pro248Leu         | 44.9 |
| 124 | AML | <i>CEBPA</i>   | c.282_312delCGTGGGCCCCACGG<br>GCGGCGGCGGCGGCGGC | p.Val95ThrfsTer55   | 22.7 |
| 124 | AML | <i>CEBPA</i>   | c.928_930dupACG                                 | p.Thr310dup         | 33   |
| 124 | AML | <i>WT1</i>     | c.1144dupG                                      | p.Ala382GlyfsTer3   | 39.9 |
| 124 | AML | <i>WT1</i>     | c.1289G>C                                       | p.Arg430Pro         | 39.9 |
| 124 | AML | <i>IKZF1</i>   | c.14_17dupAGGG                                  | p.Gln7GlyfsTer21    | 24.4 |
| 124 | AML | <i>CDAN1</i>   | c.1763T>C                                       | p.Met588Thr         | 46.6 |
| 124 | AML | <i>MYD88</i>   | c.389T>C                                        | p.Ile130Thr         | 46.7 |
| 125 | AML | <i>TP53</i>    | c.536A>G                                        | p.His179Arg         | 34.9 |
| 125 | AML | <i>TP53</i>    | c.641A>G                                        | p.His214Arg         | 35.3 |

|     |     |               |                                                                                                 |                                                                      |      |
|-----|-----|---------------|-------------------------------------------------------------------------------------------------|----------------------------------------------------------------------|------|
| 125 | AML | <i>SYNE1</i>  | c.17644G>A                                                                                      | p.Glu5882Lys                                                         | 34.5 |
| 125 | AML | <i>LAMB4</i>  | c.4438C>T                                                                                       | p.Leu1480Phe                                                         | 73.7 |
| 126 | MPN | <i>JAK2</i>   | c.1849G>T                                                                                       | p.Val617Phe                                                          | 54   |
| 126 | MPN | <i>TERT</i>   | c.838G>A                                                                                        | p.Glu280Lys                                                          | 47.8 |
| 126 | MPN | <i>RAD51</i>  | c.1dupA                                                                                         | p.Met1?                                                              | 49.2 |
| 126 | MPN | <i>KMT2C</i>  | c.2722G>T                                                                                       | p.Gly908Cys                                                          | 8.1  |
| 126 | MPN | <i>KMT2A</i>  | c.6346A>C                                                                                       | p.Thr2116Pro                                                         | 49.5 |
| 126 | MPN | <i>GPRC5A</i> | c.371G>A                                                                                        | p.Arg124Gln                                                          | 53.6 |
| 126 | MPN | <i>IFNG</i>   | c.53C>A                                                                                         | p.Ser18Tyr                                                           | 39.2 |
| 126 | MPN | <i>UNC13D</i> | c.602A>G                                                                                        | p.His201Arg                                                          | 41.8 |
| 127 | MPN | <i>CALR</i>   | c.1103_1136delAGGAGGAGGAAG<br>AAGACAAGAAACGCAAAGAGG<br>A                                        | p.Lys368ArgfsTer51                                                   | 13.5 |
| 127 | MPN | <i>KDR</i>    | c.2668A>G                                                                                       | p.Ile890Val                                                          | 44.8 |
| 127 | MPN | <i>ETV6</i>   | c.572G>T                                                                                        | p.Arg191Leu                                                          | 53   |
| 127 | MPN | <i>FANCI</i>  | c.3907G>A                                                                                       | p.Glu1303Lys                                                         | 48.6 |
| 127 | MPN | <i>ERCC4</i>  | c.1001C>T                                                                                       | p.Ser334Leu                                                          | 43.2 |
| 127 | MPN | <i>RTEL1</i>  | c.604G>A                                                                                        | p.Val202Ile                                                          | 36.1 |
| 127 | MPN | <i>FAT1</i>   | c.11818A>G                                                                                      | p.Thr3940Ala                                                         | 50.3 |
| 128 | AML | <i>FLT3</i>   | c.1796_1837dupATGATCTCAAATG<br>GGAGTTTCCAAGAGAAAATTTA<br>GAGTTTG                                | p.Phe612_Gly613insAsp<br>AspLeuLysTrpGluPheProArg<br>GluAsnLeuGluPhe | 20.6 |
| 128 | AML | <i>NPM1</i>   | c.860_863dupTCTG                                                                                | p.Trp288CysfsTer12                                                   | 35.2 |
| 128 | AML | <i>IDH1</i>   | c.394C>G                                                                                        | p.Arg132Gly                                                          | 46.9 |
| 128 | AML | <i>CEBPA</i>  | c.430dupG                                                                                       | p.Glu144GlyfsTer26                                                   | 45.1 |
| 128 | AML | <i>RAD21</i>  | c.394C>T                                                                                        | p.Gln132Ter                                                          | 46.6 |
| 128 | AML | <i>ELANE</i>  | c.407C>T                                                                                        | p.Ala136Val                                                          | 39.8 |
| 128 | AML | <i>ATRX</i>   | c.2234G>A                                                                                       | p.Ser745Asn                                                          | 100  |
| 128 | AML | <i>MRE11A</i> | c.1199G>C                                                                                       | p.Arg400Thr                                                          | 48.7 |
| 128 | AML | <i>FAT1</i>   | c.755A>C                                                                                        | p.Glu252Ala                                                          | 44.9 |
| 129 | MPN | <i>JAK2</i>   | c.1849G>T                                                                                       | p.Val617Phe                                                          | 18.8 |
| 129 | MPN | <i>VPS13B</i> | c.7333G>A                                                                                       | p.Glu2445Lys                                                         | 51.2 |
| 129 | MPN | <i>P2RY2</i>  | c.907C>T                                                                                        | p.Pro303Ser                                                          | 42.8 |
| 129 | MPN | <i>NCOR2</i>  | c.2420C>T                                                                                       | p.Thr807Met                                                          | 27.6 |
| 129 | MPN | <i>KMT2C</i>  | c.2855A>G                                                                                       | p.Lys952Arg                                                          | 50.4 |
| 130 | AML | <i>FLT3</i>   | c.1834_1835dupACTTCTACGTTGA<br>TTTCAGAGAATATGAATATGAT<br>CTCAAATGGGAGTTTCCAAGAG<br>AAAATTTAGAGT |                                                                      | 11.2 |
| 130 | AML | <i>KMT2A</i>  | exon 3-6 duplication                                                                            |                                                                      |      |
| 130 | AML | <i>GNAS</i>   | c.245A>G                                                                                        | p.Asn82Ser                                                           | 50.3 |
| 130 | AML | <i>NCOR2</i>  | c.3986-8C>T                                                                                     |                                                                      | 47.2 |
| 130 | AML | <i>NOTCH1</i> | c.6941T>A                                                                                       | p.Leu2314Gln                                                         | 45.6 |
| 130 | AML | <i>NCOR2</i>  | c.2890A>C                                                                                       | p.Lys964Gln                                                          | 44.8 |
| 130 | AML | <i>FANCI</i>  | c.3907G>A                                                                                       | p.Glu1303Lys                                                         | 49.4 |
| 131 | AML | <i>WT1</i>    | c.1018G>T                                                                                       | p.Glu340Ter                                                          | 19.2 |
| 131 | AML | <i>OR8B12</i> | c.584A>G                                                                                        | p.Glu195Gly                                                          | 49.9 |
| 131 | AML | <i>SYNE1</i>  | c.4900C>G                                                                                       | p.Gln1634Glu                                                         | 32.5 |
| 131 | AML | <i>ABCB7</i>  | c.667A>G                                                                                        | p.Ile223Val                                                          | 51   |
| 132 | AML | <i>NRAS</i>   | c.35G>A                                                                                         | p.Gly12Asp                                                           | 28.9 |
| 132 | AML | <i>EZH2</i>   | c.45G>A                                                                                         | p.Trp15Ter                                                           | 6.4  |
| 132 | AML | <i>TP53</i>   | c.818G>A                                                                                        | p.Arg273His                                                          | 37.8 |
| 132 | AML | <i>DNMT3A</i> | c.2204A>G                                                                                       | p.Tyr735Cys                                                          | 39.7 |

|     |     |                |                                                                            |                    |      |
|-----|-----|----------------|----------------------------------------------------------------------------|--------------------|------|
| 132 | AML | <i>SETBP1</i>  | c.2620G>A                                                                  | p.Asp874Asn        | 38.1 |
| 132 | AML | <i>U2AF1</i>   | c.470A>C                                                                   | p.Gln157Pro        | 43.6 |
| 132 | AML | <i>ATRX</i>    | c.4025G>A                                                                  | p.Arg1342Gln       | 98.8 |
| 132 | AML | <i>ETNK1</i>   | c.731A>G                                                                   | p.Asn244Ser        | 39.3 |
| 132 | AML | <i>KLF1</i>    | c.790T>C                                                                   | p.Ser264Pro        | 42.2 |
| 132 | AML | <i>KMT2C</i>   | c.5512C>T                                                                  | p.Pro1838Ser       | 20.6 |
| 133 | AML | <i>KMT2A</i>   | exon 2-8 duplication                                                       |                    |      |
| 133 | AML | <i>DNMT3A</i>  | c.1936+2_1936+14delTGAGGGGTG<br>CAGG                                       |                    | 10.8 |
| 133 | AML | <i>IDH2</i>    | c.515G>A                                                                   | p.Arg172Lys        | 31.5 |
| 133 | AML | <i>ATR</i>     | c.7370A>G                                                                  | p.Tyr2457Cys       | 27.2 |
| 133 | AML | <i>PRPF40B</i> | c.1893G>C                                                                  | p.Glu631Asp        | 48.1 |
| 134 | AML | <i>KRAS</i>    | c.35G>A                                                                    | p.Gly12Asp         | 12.2 |
| 134 | AML | <i>BRCA2</i>   | c.7052C>G                                                                  | p.Ala2351Gly       | 48.4 |
| 134 | AML | <i>DNMT1</i>   | c.470C>T                                                                   | p.Ala157Val        | 56.1 |
| 134 | AML | <i>RTEL1</i>   | c.3299G>A                                                                  | p.Cys1100Tyr       | 49.6 |
| 134 | AML | <i>LAMB4</i>   | c.4754G>A                                                                  | p.Arg1585Gln       | 48.4 |
| 135 | AML | <i>NRAS</i>    | c.182A>G                                                                   | p.Gln61Arg         | 9.9  |
| 135 | AML | <i>ASXL1</i>   | c.2558C>T                                                                  | p.Pro853Leu        | 19.7 |
| 135 | AML | <i>U2AF1</i>   | c.101C>A                                                                   | p.Ser34Tyr         | 37.6 |
| 135 | AML | <i>ANKRD26</i> | c.391A>G                                                                   | p.Ile131Val        | 43.3 |
| 135 | AML | <i>LAMB4</i>   | c.911C>T                                                                   | p.Pro304Leu        | 47.6 |
| 136 | AML | <i>ETV6</i>    | c.1062C>G                                                                  | p.Tyr354Ter        | 25   |
| 136 | AML | <i>BRCA2</i>   | c.10150C>T                                                                 | p.Arg3384Ter       | 52.5 |
| 136 | AML | <i>NF1</i>     | c.1885G>A                                                                  | p.Gly629Arg        | 17.1 |
| 136 | AML | <i>ETV6</i>    | c.1195C>T                                                                  | p.Arg399Cys        | 12.1 |
| 136 | AML | <i>BRCA1</i>   | c.2286A>T                                                                  | p.Arg762Ser        | 47.7 |
| 136 | AML | <i>KMT2C</i>   | c.5717G>A                                                                  | p.Arg1906Gln       | 44.6 |
| 137 | MPN | <i>CALR</i>    | c.1099_1150delCTTAAGGAGGAGG<br>AAGAAGACAAGAAACGCAAAG<br>AGGAGGAGGAGGCAGAGG | p.Leu367ThrfsTer46 | 11.3 |
| 137 | MPN | <i>RAD50</i>   | c.3836G>A                                                                  | p.Arg1279His       | 46.3 |
| 138 | MDS | <i>BCOR</i>    | c.2488_2489delAG                                                           | p.Ser830CysfsTer6  | 86.6 |
| 138 | MDS | <i>PTPN11</i>  | c.218C>T                                                                   | p.Thr73Ile         | 9.2  |
| 138 | MDS | <i>PHF6</i>    | c.241-8_244delTGCTGTAGATGT                                                 |                    | 76.3 |
| 138 | MDS | <i>NRAS</i>    | c.35G>C                                                                    | p.Gly12Ala         | 8.4  |
| 138 | MDS | <i>NRAS</i>    | c.37G>C                                                                    | p.Gly13Arg         | 17.7 |
| 138 | MDS | <i>RUNX1</i>   | c.496C>T                                                                   | p.Arg166Ter        | 49.4 |
| 138 | MDS | <i>EZH2</i>    | c.1876G>A                                                                  | p.Val626Met        | 75.5 |
| 138 | MDS | <i>SMC3</i>    | c.2338G>A                                                                  | p.Glu780Lys        | 24.3 |
| 138 | MDS | <i>EZH2</i>    | c.838T>C                                                                   | p.Ser280Pro        | 5.4  |
| 138 | MDS | <i>ETV6</i>    | c.1196G>A                                                                  | p.Arg399His        | 40.2 |
| 138 | MDS | <i>IDH2</i>    | c.568G>A                                                                   | p.Gly190Ser        | 11.3 |
| 138 | MDS | <i>RTEL1</i>   | c.1478G>A                                                                  | p.Arg493His        | 42.7 |
| 138 | MDS | <i>ETNK1</i>   | c.731A>G                                                                   | p.Asn244Ser        | 38.5 |
| 138 | MDS | <i>CDAN1</i>   | c.2066C>T                                                                  | p.Ala689Val        | 50   |
| 139 | MPN | <i>JAK2</i>    | c.1849G>T                                                                  | p.Val617Phe        | 35.7 |
| 139 | MPN | <i>PDGFRA</i>  | c.1757G>A                                                                  | p.Trp586Ter        | 33   |
| 139 | MPN | <i>XIAP</i>    | c.1100A>G                                                                  | p.Asp367Gly        | 46.9 |
