# Supplementary material for: Targeted next generation sequencing can serve as an alternative to conventional tests in myeloid neoplasms
Source: PubMed Central journal article supplement (PMC6402635; doi:10.1371/journal.pone.0212228), 2019-03-06
Supplement: pone.0212228.s005.pdf [file pone.0212228.s005.pdf]

**S5 Table. Concordance rates between Sanger sequencing and NGS results**

|        |          | NGS      |          |
|--------|----------|----------|----------|
|        |          | Positive | Negative |
| Sanger | Positive | 5        | -        |
|        | Negative | -        | 20       |

|        |          | NGS      |          |
|--------|----------|----------|----------|
|        |          | Positive | Negative |
| Sanger | Positive | 3        | -        |
|        | Negative | -        | 21       |

|        |          | NGS      |          |
|--------|----------|----------|----------|
|        |          | Positive | Negative |
| Sanger | Positive | 2        | -        |
|        | Negative | -        | 15       |

|        |          | NGS      |          |
|--------|----------|----------|----------|
|        |          | Positive | Negative |
| Sanger | Positive | 3        | -        |
|        | Negative | -        | 14       |

|        |          | NGS      |          |
|--------|----------|----------|----------|
|        |          | Positive | Negative |
| Sanger | Positive | 3        | -        |
|        | Negative | -        | 14       |

|        |          | NGS      |          |
|--------|----------|----------|----------|
|        |          | Positive | Negative |
| Sanger | Positive | 3        | -        |
|        | Negative | -        | 14       |

|        |          | NGS      |          |
|--------|----------|----------|----------|
|        |          | Positive | Negative |
| Sanger | Positive | 8*       | -        |
|        | Negative | -        | 18       |

\* By Pindel algorithm
