# Supplementary material for: Targeted next generation sequencing can serve as an alternative to conventional tests in myeloid neoplasms
Source: PubMed Central journal article supplement (PMC6402635; doi:10.1371/journal.pone.0212228), 2019-03-06
Supplement: pone.0212228.s006.pdf [file pone.0212228.s006.pdf]

**S6 Table. The results of chromosomal CNVs and conventional karyotyping**

| Case | Disease | NGS, CNV analysis with CopywriteR                                                              | Conventional karyotyping                                                      | FISH                                                        |
|------|---------|------------------------------------------------------------------------------------------------|-------------------------------------------------------------------------------|-------------------------------------------------------------|
| P38  | AML     | del 5q14.3q33.3, 7p12.2q36.3 17p                                                               | 45,XX,del(3)(p14),inv(3)(q21q26),der(5)t(3;5)(p21;q22),der(7;17)(p10;q10)[20] | No abnormalities                                            |
| P47  | AML     | 9q 21.2q31.1 interstitial deletion                                                             | 45,X,-Y,t(8;21)(q22;q22)[21]                                                  | t(8:21)                                                     |
| P19  | AML     | 9p21-ter duplication, 3q26.3 deletion                                                          | Not tested                                                                    | Inversion or translocation involving CFBF at 16q22          |
| P14  | AML     | 8q13-ter duplication                                                                           | 47,XX,+8,t(15;17)(q24;q21)[20]                                                | Trisomy 8 or Tetrasomy 8. Translocation involving t(15;17). |
| P35  | AML     | 7q31.33-ter deletion                                                                           | 46,XX,del(7)(q31)[6]/46,XX[14]                                                | del7q                                                       |
| P2   | AML     | 7q22-ter deletion, 3p13 interstitial deletion                                                  | 46,XX,del(7)(q22)[9]/46,XX[19]                                                | No abnormalities                                            |
| P76  | AML     | -7q22                                                                                          | 46,XX,del(7)(q22)[6]/46,XX[28]                                                | No abnormalities                                            |
| P82  | AML     | -7q                                                                                            | 46,XY,t(15;17)(q24;q21)[5]/46,idem,del(7)(q22)[7]/46,XY[1]                    | t(15:17)                                                    |
| P83  | AML     | -7p,-7q                                                                                        | 46,XY,t(15;17)(q24;q21)[16]/46,XY[4]                                          | t(15:17)                                                    |
| P52  | MDS     | 5q23.2q33.2 deletion, -7, 17p+, 20q11.22-ter deletion, 22q+                                    | 45-47,XX,del(5)(q31),-7,-20,+22,+2mar[cp18]/46,XX[2]                          | Not tested                                                  |
| P48  | AML     | 5q-, 7q-, 9p21.1q32 deletion, 16q12.2-ter deletion, 19q12q13.2 deletion, 22q13.31-ter deletion | 41~44,XY,+del(3)(q13),del(5),del(7)(q22),-9,add(11),-13,add(18)[cp29]         | -9 and -16                                                  |
| P42  | AML     | 5p+ 9p+, 5q-, 7q-, 9q-                                                                         | complex karyotype including del(5q), del(7), del(9q), and -21                 | +21 and -9                                                  |
| P20  | AML     | 1q21.3-ter duplication, 16q deletion                                                           | 46,XX,+del(1)(p13),-16,der(21)t(16;21)(p11;q22)                               | Monosomy 16                                                 |
| P49  | AML     | 1q+, 4q-, 5p-, 10q-, 16q+, 17q-                                                                | complex karyotype                                                             | +16 and -17                                                 |
| P81  | AML     | 1q+, 18q22q23 deletion, +21                                                                    | 46,XY,der(13;21)(q10;q10)c,der(18)t(1;18)(q12;q22),+21c[24]                   | +21                                                         |
| P9   | AML     | 13q14-21 deletion, 5q31.2 deletion                                                             | 46,XY[13]                                                                     | Translocation involving 9q34                                |
| P90  | AML     | 12p12.3p13.2 interstitial deletion                                                             | 46,XY,del(12)(p11p13)[20]                                                     | Not tested                                                  |
| P80  | AML     | +8,+11q23.3-ter, +19                                                                           | 48,XY,+8,t(11;19)(q23;p13),+der(19)t(11;19)[24]                               | KMT2A Break apart positive                                  |
| P26  | AML     | +8, 7q36.1 deletion                                                                            | 47,XX,+8,inv(16)(p13q22)[22]                                                  | inv(16), +8                                                 |
| P97  | AML     | +8, 5q21.2-ter deletion, 7q22-ter deletion                                                     | Complex karyotype                                                             | Not tested                                                  |
| P15  | AML     | +8                                                                                             | 46,XY,t(11;17)(q23;q21)[3]/47,sl,+8[7]/46,XY[10]                              | Translocation involving RARA at 17q21                       |
| P51  | MDS     | +8                                                                                             | 47,XY,+8[20]                                                                  | +8                                                          |
| P89  | AML     | +8                                                                                             | 47,XY,+8[14]/46,XY[7]                                                         | +8                                                          |

|      |     |                                |                                                           |                                  |
|------|-----|--------------------------------|-----------------------------------------------------------|----------------------------------|
| P106 | AML | +4, +10q, -18q                 | 47,XY,+4,der(18)t(10;18)(q21;q21.1)[3]/46,XY[17]          | Not tested                       |
| P107 | AML | +4                             | 47,XY,+4[13]                                              | Not tested                       |
| P44  | AML | +21                            | 46,XX,13pstk+,+21,der(21;21)(q10;q10)[3]/46,XX,13pstk+[6] | +21                              |
| P85  | AML | +13                            | 47,XY,+13[17]/ 46,XX[3]                                   | No abnormalities                 |
| P102 | AML | 1q+, +8, 6q12q16 deletion, 7q- | 47,XY,+1,der(1;7)(q10;p10),del(6)(q23),+8[20]             | +8                               |
| P11  | AML | Y loss                         | 45,X,-Y,t(8;21)(q22;q22)[20]/46,XY[4]                     | Translocation involving t(8;21)  |
| P23  | AML | -Y                             | 45,X,-Y,t(8;21)(q22;q22)[20]                              | Translocation involving t(8;21)  |
| P37  | AML | Normal                         | 47,XX,+21[11]/46,XX[19]                                   | +21                              |
| P40  | AML | Normal                         | 47,XY,der(1)t(1;1)(p36.3;q24),+8[37]/46,XY[5]             | No abnormalities                 |
| P41  | AML | Normal                         | 47,XY,+13[11]/47,XY,+15[4]/46,XY[14]                      | +15                              |
| P43  | AML | Normal                         | 46,XY,del(9)(q22)[6]/46,XY[17]                            | Not tested                       |
| P92  | AML | Normal                         | 47,XX,+11[8]/46,XX[11]                                    | +11                              |
| P12  | AML | Normal                         | 46,XY,t(15;17)(q24;q21)[7]                                | Translocation involving t(15;17) |
| P13  | AML | Normal                         | 46,XX,t(15;17)(q24;q21)[19]/46,XX[1]                      | Translocation involving t(15;17) |
| P72  | AML | Normal                         | 46,XX,t(8;21)(q22;q22)[20]                                | t(8;21)                          |
| P73  | AML | Normal                         | 46,XX,t(8;21)(q22;q22)[20]                                | t(8;21)                          |
| P84  | AML | Normal                         | 46,XY,t(15;17)(q24;q21)[16]/46,XY[4]                      | t(15;17)                         |
| P36  | AML | Normal                         | 46,XX,inv(16)(p13q22)[19]/46,XX[9]                        | inv(16),t(16;16) 60.3%           |
| P45  | AML | Normal                         | 46,XX,t(15;17)(q24;q21)[22]/46,XX[2]                      | t(15;17)                         |
| P1   | AML | Normal                         | 46,XY[20]                                                 | No abnormalities                 |
| P5   | AML | Normal                         | 46,XY[21]                                                 | No abnormalities                 |
| P6   | AML | Normal                         | 46,XY[21]                                                 | No abnormalities                 |
| P7   | AML | Normal                         | 46,XX[11]                                                 | No abnormalities                 |
| P3   | AML | Normal                         | 46,XY[20]                                                 | No abnormalities                 |
| P4   | AML | Normal                         | 46,XX[21]                                                 | No abnormalities                 |
| P28  | AML | Normal                         | 46,XY[7]                                                  | No abnormalities                 |
| P10  | AML | Normal                         | 46,XY,1qh+[17]                                            | No abnormalities                 |
| P54  | MPN | Normal                         | 46,XX[20]                                                 | Not tested                       |
| P55  | MPN | Normal                         | 46,XY[14]                                                 | Not tested                       |

|      |      |        |           |                                                        |
|------|------|--------|-----------|--------------------------------------------------------|
| P56  | MPN  | Normal | 46,XX[20] | Not tested                                             |
| P57  | MPN  | Normal | 46,XY[20] | Not tested                                             |
| P93  | AML  | Normal | 46,XY[20] | Not tested                                             |
| P94  | MPN  | Normal | 46,XY[20] | Not tested                                             |
| P95  | AML  | Normal | 46,XY[20] | Not tested                                             |
| P96  | CMML | Normal | 46,XY[20] | Not tested                                             |
| P98  | AML  | Normal | 46,XY[20] | No abnormalities                                       |
| P99  | AML  | Normal | 46,XY[20] | No abnormalities                                       |
| P100 | AML  | Normal | 46,XY[20] | -8                                                     |
| P101 | MPN  | Normal | 46,XY[20] | Not tested                                             |
| P58  | MPN  | Normal | 46,XX[20] | Not tested                                             |
| P59  | aCML | Normal | 46,XY[20] | Not tested                                             |
| P60  | MPN  | Normal | 46,XX[17] | Not tested                                             |
| P61  | MPN  | Normal | 46,XX[20] | Not tested                                             |
| P62  | MPN  | Normal | 46,XX[20] | Not tested                                             |
| P63  | MPN  | Normal | 46,XX[20] | Not tested                                             |
| P64  | MPN  | Normal | 46,XX[20] | Not tested                                             |
| P65  | MPN  | Normal | 46,XX[20] | Not tested                                             |
| P30  | MDS  | Normal | 46,XY[20] | No abnormalities                                       |
| P31  | AML  | Normal | 46,XX[24] | No abnormalities                                       |
| P32  | AML  | Normal | 46,XX[24] | No abnormalities                                       |
| P24  | AML  | Normal | 46,XY[20] | No abnormalities                                       |
| P25  | AML  | Normal | 46,XY[23] | No abnormalities                                       |
| P17  | AML  | Normal | 46,XX[20] | Amplification involving RUNX1T1 at 8q21.3 or trisomy 8 |
| P69  | MPN  | Normal | 46,XY[20] | Not tested                                             |
| P77  | AML  | Normal | 46,XY[20] | No abnormalities                                       |
| P78  | AML  | Normal | 46,XY[20] | No abnormalities                                       |
| P79  | MDS  | Normal | 46,XY[20] | No abnormalities                                       |
| P103 | MPN  | Normal | 46,XY[20] | Not tested                                             |

|      |     |        |                          |                                                        |
|------|-----|--------|--------------------------|--------------------------------------------------------|
| P104 | MPN | Normal | 46,XY[20]                | Not tested                                             |
| P105 | MPN | Normal | 46,XY[20]                | Not tested                                             |
| P109 | MPN | Normal | 46,XY[20]                | Not tested                                             |
| P110 | MPN | Normal | 46,XY[20]                | Not tested                                             |
| P111 | MPN | Normal | 46,XX[20]                | Not tested                                             |
| P87  | mpn | Normal | 46,XY[20]                | Not tested                                             |
| P112 | MPN | Normal | 46,XY[20]                | Not tested                                             |
| P68  | MPN | Normal | 46,XY[20]                | Not tested                                             |
| P71  | AML | Normal | 46,XX[22]                | Not tested                                             |
| P75  | AML | Normal | 46,XY[36]                | No abnormalities                                       |
| P39  | AML | Normal | 46,XY[22]                | Not tested                                             |
| P70  | AML | Normal | 46,XX[23]                | No abnormalities                                       |
| P34  | AML | Normal | 46,XY[20]                | Translocation involving t(8;21)                        |
| P66  | MPN | Normal | 46,XY[20]                | Not tested                                             |
| P22  | AML | Normal | 46,XY[20]                | No abnormalities                                       |
| P18  | AML | Normal | 46,XX[20]                | Translocation involving MLL at 11q23                   |
| P53  | MPN | Normal | ND                       | Not tested                                             |
| P8   | AML | Normal | Not interpretable result | No abnormalities                                       |
| P16  | AML | Normal | Not interpretable result | No abnormalities                                       |
| P91  | AML | Normal | Not interpretable result | No abnormalities                                       |
| P27  | AML | Normal | Not interpretable result | Triple translocation involving t(8;21;v) is suspected. |
